# 1 Massive gene amplification on a recently formed *Drosophila* Y 2 chromosome

3  
4 Doris Bachtrog, Shivani Mahajan & Ryan Bracewell

5  
6 *Department of Integrative Biology, University of California Berkeley, Berkeley, CA 94720, USA*  
7 email: [dbachtrog@berkeley.edu](mailto:dbachtrog@berkeley.edu)

8  
9

10

11 **Widespread loss of genes on the Y is considered a hallmark of sex chromosome differentiation. Here we**  
12 **show that the initial stages of Y evolution are driven by massive amplification of distinct classes of**  
13 **genes. The neo-Y chromosome of *Drosophila miranda* initially contained about 3000 protein-coding**  
14 **genes, but has gained over 3200 genes since its formation about 1.5 MY ago, primarily by tandem**  
15 **amplification of protein-coding genes ancestrally present on this chromosome. We show that distinct**  
16 **evolutionary processes may account for this drastic increase in gene number on the Y. Testis-specific**  
17 **and dosage sensitive genes appear to have amplified on the Y to increase male fitness. A distinct class**  
18 **of meiosis-related multi-copy Y genes independently co-amplified on the X, and their expansion is likely**  
19 **driven by conflicts over segregation. Co-amplified X/Y genes are highly expressed in testis, enriched for**  
20 **meiosis and RNAi functions, and are frequently targeted by small RNAs in testis. This suggests that their**  
21 **amplification is driven by X vs. Y antagonism for increased transmission, where sex chromosome drive**  
22 **suppression is likely mediated by sequence homology between the suppressor and distorter, through**  
23 **RNAi mechanism. Thus, our analysis suggests that newly emerged sex chromosomes are a battleground**  
24 **for sexual and meiotic conflict.**

25  
26

## 27 Introduction

28

29 Sex chromosomes have originated multiple times from ordinary autosomes<sup>1</sup>. After suppression of  
30 recombination, the proto-X and proto-Y chromosomes follow separate evolutionary trajectories and  
31 differentiate<sup>2</sup>. The complete lack of recombination on Y chromosomes renders natural selection  
32 inefficient, and Y evolution is characterized by a loss of the majority of its ancestral genes<sup>3</sup> while the X is  
33 thought to maintain most of them. Indeed, old Y chromosomes of various species contain only a few  
34 functional genes<sup>4,5</sup>, and Y chromosomes of many taxa (but not all) have instead accumulated massive  
35 amounts of repetitive DNA, including transposable elements (TEs) and satellite DNA<sup>6</sup>. In some lineages,  
36 the Y chromosome is lost entirely<sup>7</sup>.

37

38 Studies of Y chromosomes are often hindered by a lack of high-quality reference sequences, due to the  
39 technical challenges of assembling repetitive regions. To date, the Y chromosomes of only a handful of  
40 mammalian species have been fully sequenced<sup>8,9</sup> and no high-quality sequences of young Y chromosomes  
41 that have already accumulated a substantial amount of repetitive DNA have been examined.

42

43 *Drosophila miranda* has a pair of recently formed neo-sex chromosomes that originated ~1.5MY ago after  
44 its split from its closely related sister species *D. pseudoobscura*, and has served as a model to study the  
45 initiation of sex chromosome differentiation<sup>10</sup>. The neo-sex chromosomes of *D. miranda* were formed by  
46 the fusion of a former autosome (chr3 of the *pseudoobscura* group<sup>11</sup>) with the ancestral, degenerate Y  
47 chromosome of this clade<sup>12</sup>. The neo-X and neo-Y chromosome are still homologous over much of their  
48 length, with 98.5% sequence identity at homologous regions<sup>10</sup>. A previous genomic analyses using  
49 Illumina short reads confirmed the notion that genes on the Y are rapidly lost<sup>13</sup>. About  $\frac{1}{3}$  of the roughly  
50 3000 genes ancestrally present on the neo-Y were found to be pseudogenized, and over 150 genes were  
51 entirely missing<sup>13</sup>. However, the high level of sequence similarity between the neo-X and neo-Y  
52 chromosome, yet drastic accumulation of repeats on the neo-Y, prevented assembling the Y chromosome  
53 using short-read data.

54

55 We recently generated a high-quality sequence assembly of the neo-Y chromosome of *D. miranda* using  
56 single-molecule sequencing and chromatin conformation capture, and used extensive BAC clone  
57 sequencing and optical mapping data to confirm that our assembly is of high accuracy<sup>14</sup>. Intriguingly,  
58 instead of simply shrinking, our assembly revealed that the young neo-Y chromosome dramatically  
59 increased in size relative to the neo-X by roughly 3-fold. We assembled 110.5 Mb of the fused ancestral Y  
60 and neo-Y chromosome (Y/neo-Y sequence), and 25.3 Mb of the neo-X<sup>14</sup>. Most of this size increase is  
61 driven by massive accumulation of repetitive sequences—in particular transposable elements—which  
62 comprise over 50% of the neo-Y derived sequence<sup>14</sup>. Here, we carefully annotate the neo-sex  
63 chromosomes using transcriptomes from multiple tissues and small RNA profiles, to study the evolution of  
64 gene content on this recently formed neo-Y chromosome.

65

## 66 **Results**

67

### 68 **A catalogue of genes on the neo-Y**

69 With a comprehensive high-quality reference sequence of the neo-Y chromosome of *D. miranda*, we  
70 systematically catalogued its genes. Comparison of the neo-sex chromosome gene content with that of *D.*  
71 *pseudoobscura*, a close relative where this chromosome pair is autosomal, allows us to infer the ancestral

72 gene complement and reconstruct the evolutionary history of gene gains and losses along the neo-sex  
73 chromosomes (**Figure 1A**). Note that the ancestral Y chromosome of *D. pseudoobscura* is not assembled  
74 and contains no annotated protein-coding genes, and our analysis focuses on neo-sex linked genes (i.e.  
75 genes present on chr3 of *D. pseudoobscura*). Annotation of neo-Y linked genes is a challenging task, for  
76 several reasons. Genes on the neo-Y are embedded in highly repetitive sequences, and introns often  
77 dramatically increase in size due to TE insertions<sup>15</sup>. Neo-Y genes (or pseudogenes) are also often truncated  
78 or have premature stop-codons<sup>13,16</sup>. Automated annotation thus often resulted in fragmented, split or  
79 missing gene models on the neo-Y (see Methods for details), and we used extensive manual curation to  
80 validate and correct our gene models (see Methods). In particular, we bioinformatically identified and  
81 manually examined (and if necessary corrected) all neo-Y genes that were not simple 1:1 orthologs  
82 between species and neo-sex chromosomes. In total, we identified 6,448 genes on the neo-Y, and 3,253  
83 genes on the neo-X, compared to 3,087 genes on the ancestral autosome that gave rise to the neo-sex  
84 chromosome. Thus, contrary to the paradigm that Y chromosomes undergo chromosome-wide  
85 degeneration, our analysis reveals a dramatic increase in the number of annotated genes on the neo-Y,  
86 compared to its ancestral gene complement, or that of its former homolog, the neo-X.

87  
88 Overall, we detect 1,736 ancestral single-copy orthologs between the neo-sex chromosomes, i.e. roughly  
89 56% of genes ancestrally present show a simple 1:1 relationship between species and the neo-X and neo-Y  
90 chromosome. Furthermore, genes are degenerating on the non-recombining neo-Y. We find 143 genes  
91 that are located on chr3 in *D. pseudoobscura* and the neo-X of *D. miranda*, but are missing from our neo-Y  
92 annotation, and we fail to detect a homolog on the neo-Y by BLAST. Thus, about 5% of genes that were  
93 ancestrally present are now completely absent on the neo-Y. On the other hand, only 17 genes (0.5% of  
94 genes ancestrally present) are absent from the neo-X but found on the neo-Y, a rate of gene loss  
95 comparable to autosomes and the ancestral X (**Table S1**). Thus, the neo-Y is indeed losing its ancestral  
96 genes at a high rate, consistent with theoretical expectation<sup>3,17</sup> and empirical observations of gene poor  
97 ancestral Y chromosomes<sup>4,5,8,9</sup>.

98  
99 Intriguingly, however, for 457 unique single-copy *D. pseudoobscura* protein-coding genes, we find  
100 multiple copies in our neo-Y chromosome annotation of *D. miranda* (which were all verified by manual  
101 inspection of BLAST and nucmer alignments<sup>18</sup>, see Methods for details; and also confirmed by Illumina  
102 read depth analysis, see **Figure S1**). Genes with multiple copies on the Y/neo-Y fall into two groups. 363  
103 unique protein-coding genes of *D. pseudoobscura* are also single-copy (or missing) on the X/neo-X of *D.*  
104 *miranda*, but are amplified on the neo-Y (resulting in a total of 1,697 Y-linked gene copies; two of these  
105 genes were gained from chr2; **Table S2, Figure S2, S3**). The remaining 94 unique protein-coding genes of  
106 *D. pseudoobscura* that have amplified on the Y/neo-Y, surprisingly, have also co-amplified on the original

107 X and neo-X chromosome of *D. miranda* (and harbor a total of 2,036 Y/neo-Y-linked gene copies and 650  
108 copies on the X/neo-X; **Table S3, Figure 1D**). Most of the genes that co-amplified on the X and Y  
109 chromosome of *D. miranda* were ancestrally present on the autosome that formed the neo-sex  
110 chromosomes (i.e. chr3 in *D. pseudoobscura*), but some were also gained from other chromosomes (4  
111 genes from chr2, 1 gene from chr4, and 14 genes from the ancestral X; **Figure S3**). Thus, genes on the  
112 Y/neo-Y of *D. miranda* fall into distinct categories (**Figure 1B, Figure S3**), and we refer to them as single-  
113 copy Y genes, multi-copy Y genes (which are single-copy on the X/neo-X), and co-amplified X/Y genes  
114 (genes that have amplified on both the X and the Y chromosome). Genes whose ancestral location could  
115 not be determined, or genes with more complex evolutionary histories were not further analyzed (see  
116 Methods).

117

### 118 **Properties of amplified Y genes**

119 Many amplified gene copies – on both the X/neo-X and the Y/neo-Y chromosome - are fragmented, and  
120 some have premature stop codons or frame shift mutations (**Table S2, S3**). We find full-length copies for  
121 786 amplified Y genes (46%), 776 co-amplified Y-genes (38%), and 300 co-amplified X genes (46%). Thus,  
122 even if ignoring partial gene copies (which may nevertheless have function as non-coding transcripts), we  
123 still find considerably more genes on the neo-Y compared to the neo-X or the ancestral autosome that  
124 formed the neo-sex chromosomes. Genes with truncated coding regions are less likely to produce  
125 functional proteins and may thus be pseudogenes. However, many of these amplified gene copies may  
126 instead encode functional RNAs (for example, they may be involved in RNA induced silencing, as  
127 suggested by our analysis below), and thus both full-length and fragmented copies could influence  
128 organismal fitness, if expressed. Indeed, transcriptome analysis (using only uniquely mapping RNA-seq  
129 reads) shows that most individual gene copies of amplified gene families on the Y/neo-Y are expressed in  
130 male tissues, both for partial genes and full-length transcripts. We detect expression of 71% of individual  
131 copies among multi-copy Y genes, and 94% for co-amplified X/Y genes (**Table S4**). This is consistent with  
132 many gene copies on the neo-Y indeed being functional, either as a protein or as a functional RNA.

133

134 How do genes amplify on the sex chromosomes? The majority of multi-copy Y genes, or co-amplified X  
135 and Y genes are found in gene clusters (**Figure 1D, Figure S2; Table S5, S6**). In particular, we find that 89%  
136 of multi-copy Y genes are located near (within 100 kb) other copies of the same gene family, and 80% of  
137 co-amplified X and 87% of co-amplified Y genes (**Figure 1D, Figure S2; Table S5, S6**). Clustering of gene  
138 families in tandem arrays suggests that non-allelic recombination is a main factor driving gene  
139 amplification on sex chromosomes. Additionally, phylogenetic analysis reveals that individual copies of co-  
140 amplified gene families typically cluster by chromosome, indicating independent amplification on the X  
141 and Y chromosome, and confirming a lack of recombination between the neo-X and neo-Y (**Figure S4**).

142

143 Multi-copy genes often show dynamic copy number evolution between individuals<sup>19</sup>. To test for variation  
144 in copy number of amplified Y/neo-Y genes in natural populations of *D. miranda*, we generated Y-  
145 chromosome replacement lines by backcrossing Y chromosomes from different locations into the same  
146 genetic background (**Table S7, Figure S5**; see Methods). This strategy avoids confounding variation at X  
147 and autosomal regions, and Y copy number polymorphisms were estimated based on Illumina read  
148 coverage (see Methods). Overall, we find relatively little variation in copy number for both multi-copy Y  
149 and co-amplified Y genes among different neo-Y chromosomes (**Figure S6**). Low copy number variation is  
150 consistent with reduced levels of single-nucleotide diversity on the *D. miranda* neo-Y chromosome  
151 ( $\pi=0.01\%$ ; i.e. 30-fold lower than typical levels of variation in this species<sup>20</sup>), due to a recent selective  
152 sweep that completely eliminated all standing variation a few thousand years ago<sup>20</sup>.

153

## 154 **Discussion**

155

### 156 **Different evolutionary processes may cause amplification of neo-Y genes**

157 What may drive massive gene amplification on the neo-Y chromosome? Y chromosomes are subject to  
158 unique evolutionary forces: they lack recombination, show male-limited inheritance, and compete with  
159 the X over transmission to the next generation<sup>3,21</sup>. Indeed, our functional genomic analysis suggests that  
160 different processes appear to trigger gene family expansion of multi-copy Y genes versus co-amplified X/Y  
161 genes (**Figure 2**). Repetitive sequences, and in particular transposable elements are accumulating on the  
162 Y, and its high repeat content makes the Y chromosome particularly prone to accumulate multi-copy  
163 genes for multiple reasons (**Figure 2A**). On one hand, repetitive sequences can provide a substrate for  
164 non-allelic homologous recombination and thereby promote gene family expansion<sup>22</sup>. Indeed, we find  
165 several cases where repeats flank gene duplications on both the X and Y chromosome, and may have  
166 contributed to their origination (**Figure S7**). Additionally, spreading of heterochromatin from repeats  
167 globally dampens expression of neo-Y genes<sup>23</sup>, and multi-copy gene families may simply be more  
168 tolerated on the neo-Y (although many individual gene copies are transcribed, **Table S4**).

169

170 Gene family expansions on the Y can also be beneficial for males (**Figure 2B**). Global transcription is lower  
171 from the neo-Y chromosome of *D. miranda*<sup>24</sup>, and drives the evolution of dosage compensation of  
172 homologous neo-X genes<sup>25</sup>. In *Drosophila*, dosage compensation is achieved by transcriptional up-  
173 regulation of X-linked genes in males<sup>26</sup>. *D. miranda* has evolved only partial dosage compensation of its  
174 neo-X chromosome<sup>25,27</sup>, and gene amplification may help compensate for reduced gene dose of neo-Y  
175 genes, especially if their neo-X homologs are not yet dosage compensated. Additionally, Y chromosomes  
176 are transmitted from father to son, and are thus an ideal location for genes that specifically enhance male

177 fitness<sup>28</sup>. Y chromosomes of several species, including humans, have been shown to contain multi-copy  
178 gene families that are expressed in testis and contribute to male fertility<sup>29-31</sup>.  
179  
180 Gene amplification on the Y could also be a signature of intragenomic conflicts (**Figure 2C**). Y  
181 chromosomes compete with the X over transmission to the next generation<sup>32,33</sup>, and sex chromosomes  
182 may try to cheat fair meiosis to bias their representation in functional sperm (i.e. meiotic drive). Meiotic  
183 drive on sex chromosomes, however, reduces fertility and distorts population sex ratios<sup>32</sup>, and creates  
184 strong selective pressure to evolve suppressors to silence selfish drivers. Suppression of sex chromosome  
185 drive could be mediated by sequence homology between the suppressor and distorter, through RNAi  
186 mechanisms, and could result in co-amplification of genes on the X and Y chromosome. The RNAi pathway  
187 has been implicated to mediate suppression of sex chromosome drive in *Drosophila*<sup>34-36</sup>.

188

### 189 **Amplification of multi-copy neo-Y genes may increase male fitness**

190 We find a handful of multi-copy Y gene families that have dozens of gene copies on the Y (six gene  
191 families have more than 30 copies, and 14 gene families have >15 copies; **Figure 3A, B, Figure S8**), while  
192 the vast majority of multi-copy Y gene families only have a few copies (90% of multi-copy Y gene families  
193 have fewer than 4 copies). Dosage compensation counters ploidy differences of X-linked genes in males  
194 vs. females (i.e. one vs. two copies), and thus may contribute to amplification of multi-copy Y genes with  
195 few copies (i.e. 2-4 copies on the Y), while testis-expressed multi-copy Y genes often contain dozens of  
196 gene copies<sup>29-31,37</sup>. Gene expression and chromatin analysis support that different evolutionary forces may  
197 contribute to the accumulation of low versus high-copy number multi-copy Y gene families.

198

199 Multi-copy Y gene families with a high copy number (i.e. >15 copies) are expressed almost exclusively in  
200 testis (**Figure 3A, Figure S8, S9**), mimicking patterns of gene family amplification of male fertility genes  
201 found in other species<sup>4,29,31,38,39</sup>. Their neo-X homologs, in contrast, are expressed predominantly in  
202 ovaries (**Figure S8, S9**). Gene expression profiles in *D. pseudoobscura* suggests that these genes were  
203 ancestrally highly expressed in testis and/or ovaries (**Figure 3B**), and sex-linkage may have enabled neo-Y  
204 and neo-X gametologs to specialize in their putative male- and female specific function, respectively<sup>28</sup>.  
205 Most multi-copy Y gene families, in contrast, only have few copies and are ubiquitously expressed (**Figure**  
206 **3A**). Consistent with gene dosage contributing to increased copy number on the Y, the neo-X homologs of  
207 multi-copy Y genes are less likely to be dosage compensated compared to single-copy Y genes (**Figure 3C**).  
208 In particular, male *Drosophila* achieve dosage compensation by recruiting the MSL-complex to their  
209 hemizygous X chromosome<sup>26</sup>, and neo-X homologs of multi-copy neo-Y genes are less likely to be targeted  
210 by the MSL complex in male *D. miranda* larvae<sup>27</sup> than the neo-X homologs of single-copy neo-Y genes  
211 (**Figure 3C**, p-value Fisher's exact test = 0.007). This suggests that many multi-copy Y genes are dosage

212 sensitive, and additional gene copies on the Y may contribute to dosage compensation. Truncated neo-Y  
213 genes are less likely to produce functional proteins and thus alleviate gene dose deficiencies. Despite  
214 having many fewer copies on the Y on average (average 3 copies per gene), the low copy number multi-  
215 copy Y genes have a similar fraction of genes with at least two full-length copies (roughly half) as high-  
216 copy number multi-copy Y genes (average 26 copies per gene), or co-amplified X/Y genes (22 copies per  
217 gene; see **Table S2, S3**). Genes that co-amplify on the X and Y chromosome, on the other hand, show  
218 testis-biased expression, independent of copy number (**Figure 3A**). Gene ontology (GO) analysis found no  
219 significant enrichment of gene annotations among multi-copy Y genes, consistent with a broad category  
220 of (possibly dosage sensitive) genes amplifying on the Y. Overall, our analysis is consistent with a  
221 considerable fraction of multi-copy Y genes having an important function in males, as supported by tissue-  
222 specific expression, or patterns of MSL-binding.

223

#### 224 **X/Y co-amplified genes suggest ongoing conflict over sex chromosome transmission**

225 Functional enrichment analysis (**Figure 4A, B**), gene expression patterns and small RNA profiles (**Figure 5**)  
226 suggest that fundamentally different forces drive co-amplification of genes on the X and Y chromosome.  
227 Overall, we identify 2683 co-amplified genes on the neo-sex chromosomes of *D. miranda* (2036 genes  
228 amplified on the Y/neo-Y, and 650 on the X/neo-X). Co-amplified X/Y genes belong to 94 distinct proteins  
229 that were ancestrally single-copy on the autosome that formed the neo-sex chromosomes of *D. miranda*  
230 (that is, these genes are single-copy on chr3 of *D. pseudoobscura*), and phylogenetic analysis confirms  
231 their independent amplification on the X and Y (**Figure S4**). Co-amplified X and Y-linked gene copies are  
232 typically both highly expressed in testis (**Figure 3A, Figure 5B; Figure S8, S9**). Testis expression of co-  
233 amplified X-linked genes is unusual, as testis-genes in *Drosophila* normally avoid the X chromosome<sup>40-43</sup>,  
234 but can be understood under intragenomic conflict models<sup>21,34,35,44,45</sup>. In particular, an X-linked gene  
235 involved in chromosome segregation may evolve a duplicate that acquires the ability to incapacitate Y-  
236 bearing sperm (**Figure 2C**). Invasion of this segregation distorter skews the population sex ratio and  
237 creates a selective advantage to evolve a Y-linked suppressor that is resistant to the distorter. Suppression  
238 may be achieved at the molecular level by increased copy number of the wildtype function or by  
239 inactivation of X-linked drivers using RNAi<sup>34-36</sup>. If both driver and suppressor are dosage-sensitive, they  
240 would undergo iterated cycles of expansion, resulting in rapid co-amplification of both driver and  
241 suppressor on the X and Y chromosome<sup>32</sup>.

242

243 Consistent with a model of ongoing conflicts over chromosome segregation driving co-amplification of X/Y  
244 genes, we find that many of the most highly co-amplified genes have well-characterized functions in  
245 meiosis (**Figure 3D, Table S3**), and are ancestrally expressed in gonads (using gene expression data from  
246 *D. pseudoobscura* as a proxy for ancestral expression; **Figure 5C, Figure S10**). Gene ontology (GO) analysis



247 reveals that co-amplified X/Y genes are significantly overrepresented in biological processes associated  
248 with meiosis and chromosome segregation (**Figure 4A, 3B**). In particular, multi-copy Y genes are  
249 significantly enriched for GO categories including “nuclear division”, “spindle assembly”, “meiotic spindle  
250 midzone assembly”, “DNA packaging”, “chromosome segregation”, or “male gamete generation” (see  
251 **Table S3**). Among the most highly co-amplified X/Y genes are well-studied genes with important function  
252 in meiosis, including *wurdfest* (145 copies on the Y and 5 on the X), a gene involved in spindle assembly in  
253 male meiosis I; *mars* (48 Y-linked copies and 6 X-linked copies), a gene involved in kinetochore assembly  
254 and chromosome segregation, *orientation disruptor* (18 Y-linked copies and 5 X-linked copies), a  
255 chromosome-localized protein required for meiotic sister chromatid cohesion, or *Subito* (8 Y-linked copies  
256 and 11 X-linked copies), a gene required for spindle organization and chromosome segregation in meiosis  
257 (**Figure 3D, Figure 4**, see **Table S3** for additional genes). These important meiosis genes are typically  
258 single-copy and highly conserved across insects, but highly co-amplified on the recently evolved *D.*  
259 *miranda* X and Y chromosome.

260

#### 261 **Possible involvement of RNAi in sex chromosome drive**

262 Additionally, our GO analysis reveals a significant overrepresentation of co-amplified X/Y genes associated  
263 with piRNA metabolism and the generation of small RNA's (**Figure 4A, 3B**). Again, this is expected under  
264 recurring sex chromosome drive where silencing of distorters is achieved by RNAi, since compromising the  
265 small RNA pathway would release previously silenced drive systems<sup>36</sup>. Noteworthy genes in the RNAi  
266 pathway that are typically single-copy in insects but co-amplified on the X and Y of *D. miranda* include  
267 *Dicer-2* (26 Y- and 6 X-linked copies), a double-stranded RNA-specific endonuclease that cuts long double-  
268 stranded RNA into siRNAs, *cutoff* (7 Y- and 9 X-linked copies), a gene involved in transcription of piRNA  
269 clusters, or *shutdown* (50 Y- and 22 X-linked copies), a co-chaperone necessary for piRNA biogenesis  
270 (**Figure 3D, Figure 4, Table S3**). Thus, functional enrichment supports a model of meiotic conflict driving  
271 co-amplification of X/Y genes.

272

273 We gathered stranded RNA-seq and small RNA profiles from wildtype *D. miranda* testis, to obtain insights  
274 into the molecular mechanism of putative sex chromosome drive. Consistent with a model of meiotic  
275 drive and suppression through RNAi mechanisms causing co-amplification of X/Y genes, we detect both  
276 sense and antisense transcripts and small RNA's derived from the vast majority of co-amplified X/Y genes  
277 (**Figure 5D-G, Figure 6**). Globally, we find that co-amplified Y genes show significantly higher levels of anti-  
278 sense transcription and small RNA production than single-copy Y genes, or multi-copy Y genes (**Figure**  
279 **5D,F**; Wilcoxon test p-value <  $10^{-16}$ , **Table S8**). Likewise, small RNA levels are higher for co-amplified X  
280 linked genes, compared to single-copy X genes, or X homologs of multi-copy Y genes (**Figure 5E,G**;  
281 Wilcoxon test p-value <  $10^{-16}$ , **Table S8**). Anti-sense transcription of many co-amplified X/Y genes suggests



282 that they may function not as proteins, but instead as functional RNA by generating double-stranded RNA  
283 and triggering the RNAi silencing pathway. Targeting of co-amplified X/Y genes by small RNA's in testis  
284 demonstrates that small RNA production is not simply a consequence of the repeat-rich environment of  
285 the neo-Y but instead a property of co-amplified X/Y genes. Overall, our data are consistent with sex  
286 chromosome drive having repeatedly led to characteristic patterns of gene amplification of homologous  
287 genes on both the X and the Y chromosomes that are targeted by small RNAs (**Figure 6**).

288

## 289 **Conclusions**

290

291 Contrary to the paradigm that Y chromosomes undergo global degeneration, we document a high rate of  
292 gene gain on the recently formed neo-Y chromosome of *D. miranda*, mainly through amplification of  
293 genes that were ancestrally present on the autosome (chr3) that became the neo-Y. Our comparative  
294 genomic analysis reveals different types of amplified Y genes, and we show that their acquisition likely is  
295 driven by different selective pressures. Multi-copy genes exclusive to the Y presumably increase male  
296 fitness, while genes that are co-amplified on the X and Y likely reflect intragenomic conflict. Multi-copy Y  
297 genes come in two flavors, and our analysis suggests that they are either selected and amplifying on the Y  
298 because of their testis-specific function, or to compensate for gene dosage deficiencies. Genes with testis-  
299 biased expression often have dozens of copies on the Y, and their neo-X homologs are often expressed in  
300 ovaries, and sex linkage may have allowed these former homologs to specialize in their sex-specific  
301 roles<sup>36</sup>. Ubiquitously expressed housekeeping genes also duplicate on the Y, possibly to mitigate gene  
302 dose deficiencies of partially silenced neo-Y genes; these genes are present at a much lower copy number,  
303 and are targeted less often by the dosage compensation complex on the X.

304

305 Co-amplified X/Y genes are highly expressed in testis and often have functions in chromosome  
306 segregation and RNAi, and we speculate that their parallel amplification on the X and Y is a result of  
307 ongoing X-Y interchromosomal conflicts over segregation. Sequence homology between putative drivers  
308 and their suppressors on the sex chromosomes, and their widespread targeting by small RNAs suggests  
309 that RNAi mechanisms are involved in silencing rampant sex chromosome drive. If amplified Y genes are  
310 involved in a battle with the X over fair transmission, changes in gene copy number may bias inclusion  
311 into functional sperm, and may trigger repeated co-amplification of distorters and suppressors on the sex  
312 chromosomes.

313

314 In principle, either sex chromosome could initiate this evolutionary tug-of-war over transmission into  
315 functional sperm. While we cannot determine the sequence of evolutionary events with certainty, the X  
316 chromosome is *a priori* more likely to acquire segregation distorters, creating strong selection to evolve

317 suppressors on the Y. On one hand, natural selection is impaired on the non-recombining Y<sup>3</sup>, making  
318 drivers more likely to originate on the X. Additionally, the heterochromatic nature of a Y chromosome  
319 may render it especially vulnerable to be exploited by selfish elements during meiosis<sup>46</sup>.  
320  
321 Rampant sex chromosome drive can have important evolutionary consequences. Strong selective  
322 pressure to amplify Y-linked suppressors of meiotic drive may indirectly account for the complete genetic  
323 decay of the Y. Since the Y chromosome lacks recombination, strong positive selection for meiotic drive  
324 suppressors can propel linked deleterious mutations to fixation<sup>17</sup>, and the ongoing degeneration of  
325 ancestral Y genes may thus be a by-product of silencing recurrent meiotic drivers arising on the X.  
326 Patterns of molecular variation are suggestive of episodes of recurrent positive selection shaping neo-Y  
327 evolution of *D. miranda*<sup>20</sup>, and natural lines of *D. miranda* show a wide range of sex-ratio bias (with  
328 typically female-biased sex ratios<sup>12</sup>). These observations are consistent with recurrent and ongoing  
329 conflicts over segregation affecting the genomic architecture of sex chromosomes in this species.  
330  
331 Genetic conflict between X-Y ampliconic genes may also contribute to hybrid sterility and consequent  
332 reproductive isolation<sup>33,4748</sup>. Segregation distortion can result in male hybrid sterility in *Drosophila*<sup>49</sup>, and  
333 further functional characterization of co-amplified, lineage-specific X-Y gene families will be needed to  
334 test the proposed link between X-Y genetic conflict and hybrid sterility.  
335  
336 X-Y interchromosomal conflict, and its consequent impact on gene amplification on sex chromosomes,  
337 may be widespread. In both human and mouse—two species with high-quality reference sequences for  
338 both sex chromosomes—the X and Y have co-acquired and amplified genes, and in both cases, meiotic  
339 drive has been invoked to explain this co-amplification<sup>9,50-5253</sup>. Co-amplified genes have also been found in  
340 *D. melanogaster*<sup>54</sup>, and RNAi mechanisms have been shown to mediate suppression of sex ratio drive in  
341 flies<sup>34-36</sup>. Highly amplified gene families have been detected in other mammals<sup>55</sup> and across fruit flies<sup>56</sup>,  
342 suggesting that sex chromosome drive may be prevalent in evolution; to determine the true phylogenetic  
343 range of lineage-specific acquisition and amplification of X-Y genes, high-quality sex chromosome  
344 assemblies across more taxa are needed.  
345

## 346 **Materials and methods**

347

### 348 **Genome and data availability**

349 A 150-kb fragment of the Y chromosome was found to be missing in the previous genome assembly<sup>14</sup> and  
350 the Y fragment was correctly reinserted before all downstream analyses. The updated genome assembly

351 has been submitted to GenBank. All the data that were used and generated for this project are given in  
352 **Table S9**.

353

#### 354 ***De novo* transcriptome assembly**

355 To mask repeats in the genome, we used RepeatMasker<sup>57</sup> with custom *de novo* repeat libraries,  
356 generated using RepeatModeler<sup>58</sup> and Repdenovo<sup>59</sup>, along with the Drosophila repeat library from  
357 Repbase<sup>60</sup>. The *de novo* repeat libraries are given in **Data Supplement 1**, and a repeat-masked gff file is  
358 given in **Data Supplement 2**. Paired end RNA-seq reads from several male and female tissues (heads,  
359 carcass, whole body, testis, ovary, accessory gland, spermatheca, 3<sup>rd</sup> instar larvae) were then aligned to  
360 the repeat-masked genome using HiSat2<sup>61</sup> with the --dta parameter on default settings. The resulting  
361 alignment file was used to assemble the transcriptome using the software StringTie<sup>62</sup> with default  
362 parameters. Fasta sequences of the transcripts were extracted from the gtf output produced by StringTie  
363 using the gffread utility.

364

#### 365 **Gene annotation with Maker**

366 We ran Maker<sup>63</sup> three times to iteratively build and improve the gene annotation of the neo-sex  
367 chromosomes. For the first Maker run, we used annotated protein sequences for *D. melanogaster* and *D.*  
368 *pseudoobscura* from flybase.org, our *de novo* assembled *D. miranda* transcripts (see above), and the gene  
369 predictors Augustus<sup>64</sup> and SNAP<sup>65</sup> to get the initial set of predictions. The parameters est2genome and  
370 protein2genome were set to 1 to allow Maker to directly build gene models from the transcript and  
371 protein alignments, and we used the Augustus fly gene model and the SNAP *D. melanogaster* hmm file for  
372 this first run. The predictions from the first round were then used to train Augustus using BUSCO<sup>66</sup> and  
373 also to train SNAP. The new Augustus gene model and SNAP hmm file were then used during the second  
374 Maker run, with the parameters est2genome and protein2genome set to 0. The maximum intron size was  
375 increased to 20000bp (default 10000bp). The results from the second round were then used to train  
376 Augustus and SNAP again, before the final round of Maker. This process resulted in a total of 21,524  
377 annotated genes in *D. miranda*.

378

#### 379 **Orthology detection**

380 Transcript sequences for *D. pseudoobscura* were downloaded from flybase.org and only the largest  
381 transcript per gene was retained for downstream analyses. *De novo* annotated *D. miranda* transcripts  
382 were then aligned to this filtered *D. pseudoobscura* transcript set using BLAST<sup>67</sup>. Alignments with  
383 percentage identity <60% were discarded and the best alignment was calculated based on the e-value,  
384 score, % identity and alignment lengths. Each *D. miranda* transcript was thus assigned the ortholog that  
385 was its best BLAST hit. We identified paralogous genes in the *D. pseudoobscura* genome as those for

386 which at least 80% of the sequence of one aligned to the other and vice versa. Paralogous genes in the *D.*  
387 *miranda* – *D. pseudoobscura* orthology calls were replaced by a single gene name from the duplicated  
388 gene family.

389

### 390 **Identifying multicopy genes**

391 The gene annotation produced by Maker had roughly 2,500 more genes annotated on the Y/neo-Y  
392 compared to the neo-X, and hundreds of genes had multiple annotated copies on the Y/neo-Y  
393 chromosome (and also the X chromosome and autosomes in some cases). Based on the orthology calls  
394 from BLAST, 822 Maker annotated genes had more than 2 copies on the Y/neo-Y, and 209 of those genes  
395 had more than two copies on both the X/neo-X and Y/neo-Y. In our initial Maker annotation, 366 genes  
396 were missing on the neo-Y and 155 genes were missing on the neo-X. However, closer inspection revealed  
397 that the annotation was often fragmented, especially on the Y/neo-Y chromosome, which led to an  
398 overestimation of the number of distinct genes that had duplicated, but subsequent BLAST searches also  
399 revealed that Maker often failed to annotate individual copies of gene families. On the other hand,  
400 several genes in the annotation were “chimeras”, where two genes were collapsed into one by Maker and  
401 thus one of the genes appeared to be missing from the gene annotation, if it got assigned to the other *D.*  
402 *pseudoobscura* gene during orthology assignment. Thus, the actual number of missing genes is much  
403 smaller than our initial Maker annotation suggested. We thus manually verified, and if necessary fixed,  
404 each gene model that was annotated by Maker, and inferred to be either duplicated on the Y/neo-Y or  
405 missing from the neo-X and/or Y/neo-Y annotations. We used nucmer<sup>18</sup> from the mummer package to  
406 individually align (one gene at a time) the sequences of their corresponding *D. pseudoobscura* orthologs  
407 to the *D. miranda* genome with the parameters --maxmatch and --nosimplify. Alignment coordinates were  
408 manually stitched together to get full gene coordinates. Only fragments that were at least 25% the length  
409 of the corresponding *D. pseudoobscura* ortholog, or at least 1000-bp long, were counted as  
410 duplicates/paralogs in the *D. miranda* genome. We also performed BLAST searches to identify the genes  
411 that had been lost from the neo-sex chromosomes.

412

413 In total, we annotate 6,448 genes on the neo-Y. Of these, 1,736 are ancestral single-copy Y genes (i.e. they  
414 were present on the ancestral autosome that formed the neo-Y). 1,105 of these genes were readily  
415 identified on both the neo-X and neo-Y by our Maker annotation, and are used as the single-copy  
416 orthology gene set in our analysis. 631 ancestral single-copy Y genes were initially missed or mis-qualified  
417 by our Maker annotation (i.e. 347 neo-Y genes were wrongly annotated as multi-copy by Maker, but our  
418 manual inspection revealed that they were present only as single-copy genes, and 114 neo-X genes and  
419 170 neo-Y genes were missing from the Maker annotation, but found to be present on the neo-X and neo-  
420 Y, respectively, after manual checking using nucmer<sup>18</sup>.

421

422 In addition, we identify 457 genes (with 3,733 gene copies) that have become amplified on the neo-Y:  
423 1,697 multi-copy Y genes (with a single copy on the neo-X), and 2,036 co-amplified neo-Y genes (which  
424 also amplified on the X/neo-X). In addition, we detect 959 genes in our Maker annotation that were not  
425 further considered. These “other” genes are comprised of 159 neo-Y genes that lack a homolog in *D.*  
426 *pseudoobscura*, 287 neo-Y genes that are present on an unknown location in *D. pseudoobscura*, 189  
427 single-copy neo-Y genes that are present at multiple other locations in the genome (based on the Maker  
428 annotation), and 324 genes (from 49 unique proteins) with complicated mapping which could not be  
429 included in any categories of our analysis (i.e. genes for which the number of copies were ambiguous  
430 based on alignments such as for nested/overlapping genes; genes for which many alignments of variable  
431 identity were observed; genes which were amplifying on autosomes and the Y chromosome; chimeric  
432 genes).

433

434 Thus, after manual verification, we identified 94 genes that have co-amplified on the X/neo-X and the  
435 Y/neo-Y, with 647 copies on the X/neo-X and 2036 copies on the Y/neo-Y (and 58 copies on the  
436 autosomes). We also identified 363 genes that have only amplified on the Y/neo-Y chromosome, with a  
437 total of 1697 copies on the Y/neo-Y. Thus, the Y/neo-Y chromosome has gained at least 3200 gene copies.

438

439 We identified 17 genes that are present on chr3 in *D. pseudoobscura* but are missing on the neo-X in *D.*  
440 *miranda*; 6 of those genes are found on other chromosomes in the *D. miranda* genome and 6 are still  
441 present on the Y chromosome in *D. miranda*. We identified 143 genes that are present on chr3 in *D.*  
442 *pseudoobscura* but absent on the neo-Y in *D. miranda* and 138 of those are still present on the neo-X in *D.*  
443 *miranda*. However 5 genes have been lost from both the neo-X and neo-Y chromosomes and BLAST  
444 searches failed to identify other chromosomal locations that those genes could have moved to. Genome  
445 annotations for all genes, multi-copy Y genes and their homologs, and co-amplified X and Y genes are  
446 given in **Data Supplements 3-5**.

447

448 Karyotype plots showing co-amplified X/Y genes were produced using karyoploteR<sup>68</sup>. Plots showing multi-  
449 copy gene locations on the neo-X and neo-Y (Y1 and Y2) were created using genoPlotR<sup>69</sup>.

450

#### 451 **Y-chromosome replacement lines**

452 Y chromosomes from seven *D. miranda* lines (**Table S7**) were moved into an MSH22 (reference)  
453 background by repeated backcrossing of hybrid males (8 generations) with virgin MSH22 females. We  
454 then extracted DNA from a single male from each Y-chromosome replacement line using a Qiagen DNeasy  
455 kit following the standard extraction protocol. DNA libraries were prepared using the Illumina TruSeq

456 Nano Prep kit and sequenced on a Hiseq 4000 with 100bp PE reads. Raw reads from these seven Y-  
457 chromosome replacement lines along with sequencing data for three isofemales lines (MA03.4, 0101.7,  
458 MA03.2) were initially mapped to the reference MSH22 genome using BWA mem<sup>70</sup>. The resulting files  
459 were processed using Samtools<sup>71</sup> and PCR duplicates were removed using Picard Tools. We called SNPs  
460 using GATK's UnifiedGenotyper<sup>72</sup> and filtered SNPs using VCFtools<sup>73</sup> and retained biallelic SNPs, positions  
461 with no more than 50% of individuals missing a call, and individual genotypes with GQ > 30 and depth > 3  
462 and < 80.

463 To confirm Y replacement, we first estimated nucleotide diversity ( $\pi$ ) using VCFtools across each  
464 chromosome with the expectation that it should be uniformly low given that MSH22 is an inbred line. We  
465 noted a few regions that showed peaks of elevated heterozygosity (**Figure S5A**), which is indicative of  
466 either residual heterozygous regions in the MSH22 line or suggests that our backcrossing failed to replace  
467 all chromosomes with MSH22 chromosomes. Further, the MSH22 Y<sup>BB51</sup> line appeared to be heterozygous  
468 across all of chr4 while all its other chromosomes appeared to be replaced with MSH22 chromosomes.  
469 However, given that variation on chr4 of line BB51 likely contributes little to Y chromosome gene  
470 amplification estimates, we retained MSH22 Y<sup>BB51</sup> in our analyses. Phylogenetic networks using  
471 SplitsTree<sup>74</sup> for chr2 (17,189 SNPs) and the Y chromosome (1,543 SNPs) confirmed that chr2 of Y-  
472 chromosome replacement lines appeared identical to MSH22 while the seven Y chromosomes all  
473 appeared genetically distinct (**Figure S5B, C**).

474

#### 475 **Read coverage analysis to infer gene copy number**

476 We used DIAMOND<sup>75</sup> to align raw Illumina reads from each Y-chromosome replacement line to the  
477 longest isoform for each *D. miranda* protein (n=12,180). Only the top hit for each read was retained, and  
478 mean coverage over each protein was estimated using Bedtools<sup>76</sup>. To estimate the copy number for co-  
479 amplified Y, multi-copy Y, and multi-copy autosome and X genes we normalized estimates using median  
480 coverage over 98 randomly selected X-linked single copy genes.

481

#### 482 **Phylogenetic analysis of co-amplified X/Y genes**

483 Co-amplified X/Y gene regions and their *D. pseudoobscura* ortholog were aligned using MAFFT<sup>77</sup>. Due to  
484 the fragmented nature of some Y copies, a small number of copies were removed to maximize the  
485 number of informative sites while retaining most gene copies. We created rooted maximum-likelihood  
486 phylogenetic trees using RAxML 8.2.9<sup>78</sup> with 200 bootstrap replicates and a GTR + gamma model of  
487 sequence evolution. Phylogenetic trees were visualized using FigTree version 1.4.3

488 (<https://github.com/rambaut/figtree/>).

489

#### 490 **Gene expression analysis**

491 Kallisto<sup>79</sup> was used to quantify gene expression and calculate TPM values for each gene in our annotation  
492 using several male and female tissues (whole body, carcass, 3<sup>rd</sup> instar larvae, gonads, spermatheca and  
493 accessory gland) using default parameters and 100 bootstraps. The R function heatmap.2 from the gplots  
494 package (<https://cran.r-project.org/web/packages/gplots/index.html>) was used to plot heatmaps to  
495 visualize tissue-specific differences in gene expression. Each row in the heatmap is a different gene and  
496 the different columns represent different tissues. The heatmap was row-normalized (each row was scaled  
497 to have mean 0 and standard deviation 1) to indicate the tissue with the highest expression for each gene.  
498 The tissue-specificity index,  $\tau$  was calculated in the following manner:

$$499 \tau = \frac{\sum_{i=1}^n (1 - \hat{x}_i)}{n - 1}$$

500  
501 where,  $x_i$  is the expression of the gene (TPM) in tissue  $i$ ,  $n$  is the number of tissues, and

$$502 \hat{x}_i = \frac{x_i}{\max_{1 \leq i \leq n} (x_i)}$$

#### 503 504 **GO analysis**

505 GO analysis was done using GOrilla<sup>80</sup> and the *D. melanogaster* orthologs of the genes co-amplifying on the  
506 X and Y was used as the target set. The GO terms that were enriched and had a p-value less than  $10^{-3}$  and  
507  $\text{fdr}$  less than 0.05 were visualized using the software Revigo<sup>81</sup>.

#### 508 509 **Testis RNA libraries**

510 We dissected testes from 3-8 day old virgin males of *D. miranda* (strain MSH22) reared at 18°C on  
511 Bloomington food. We used Trizol (Invitrogen) and GlycoBlue (Invitrogen) to extract and isolate total RNA.  
512 We resolved 20  $\mu\text{g}$  of total RNA on a 15% TBE-Urea gel (Invitrogen) and size selected 19-29 nt long RNA,  
513 and used Illumina's TruSeq Small RNA Library Preparation Kit to prepare small RNA libraries, which were  
514 sequenced on an Illumina HiSeq 4000 at 50 nt read length (single-end). We used to Ribo-Zero to deplete  
515 ribosomal RNA from total RNA, and used Illumina's TruSeq Stranded Total RNA Library Preparation Kit to  
516 prepare stranded testis RNA libraries, which were sequenced on an Illumina HiSeq 4000 at 100 nt read  
517 length (paired-end).

#### 518 519 **Analysis of testes smRNA and testes totalRNA data**

520 Stranded total RNA paired-end reads were mapped to the *D. miranda* genome using HiSat2<sup>61</sup> with default  
521 parameters and the --rna-strandness parameter set to RF. Single-end small RNA-seq reads were aligned to  
522 the genome using bowtie2<sup>82</sup> and default parameters. BamCoverage from the deeptools package<sup>83</sup> was  
523 used to convert bam alignment files to bigwig format in both cases to be visualized using IGV. Sense and  
524 antisense transcription estimates were obtained based on the alignment and the orientation of genes



525 using bedtools<sup>84</sup>. The number of small RNA and total RNA reads mapping to the co-amplified X/Y genes  
526 were summed for each gene family, based on sense or antisense transcription, and barplots of counts  
527 were plotted in log2 scale using R (Figure 5D and 5E). The number of small RNA reads mapping to each  
528 annotated gene (sense and antisense counts) were divided by the gene/fragment length and boxplots  
529 were plotted in R for single copy Y genes, genes that have only amplified on the Y and genes that have co-  
530 amplified on the X and Y (Figure 5G).

531

## 532 References

533

- 534 1. Bachtrog, D. *et al.* Are all sex chromosomes created equal? *Trends Genet.* **27**, 350–357 (2011).
- 535 2. Charlesworth, B. Model for evolution of Y chromosomes and dosage compensation. *Proc. Natl.*  
536 *Acad. Sci. U.S.A.* **75**, 5618–5622 (1978).
- 537 3. Bachtrog, D. Y-chromosome evolution: emerging insights into processes of Y-chromosome  
538 degeneration. *Nat. Rev. Genet.* **14**, 113–124 (2013).
- 539 4. Mahajan, S. & Bachtrog, D. Convergent evolution of Y chromosome gene content in flies. *Nat*  
540 *Commun* **8**, 785 (2017).
- 541 5. Bellott, D. W. *et al.* Avian W and mammalian Y chromosomes convergently retained dosage-  
542 sensitive regulators. *Nat. Genet.* **49**, 387–394 (2017).
- 543 6. Gatti, M. & Pimpinelli, S. Functional elements in *Drosophila melanogaster* heterochromatin. *Annu.*  
544 *Rev. Genet.* **26**, 239–275 (1992).
- 545 7. Blackmon, H., Ross, L. & Bachtrog, D. Sex Determination, Sex Chromosomes, and Karyotype  
546 Evolution in Insects. *J. Hered.* **108**, 78–93 (2017).
- 547 8. Hughes, J. F. *et al.* Conservation of Y-linked genes during human evolution revealed by  
548 comparative sequencing in chimpanzee. *Nature* **437**, 100–103 (2005).
- 549 9. Soh, Y. Q. S. *et al.* Sequencing the mouse Y chromosome reveals convergent gene acquisition and  
550 amplification on both sex chromosomes. *Cell* **159**, 800–813 (2014).
- 551 10. Bachtrog, D. & Charlesworth, B. Reduced adaptation of a non-recombining neo-Y chromosome.  
552 *Nature* **416**, 323–326 (2002).
- 553 11. Muller, H. J. in *The new Systematics* (ed. JS, H.)
- 554 12. Dobzhansky, T. *Drosophila Miranda*, a New Species. *Genetics* **20**, 377–391 (1935).
- 555 13. Zhou, Q. & Bachtrog, D. Sex-specific adaptation drives early sex chromosome evolution in  
556 *Drosophila*. *Science* **337**, 341–345 (2012).
- 557 14. Mahajan, S., Wei, K. H.-C., Nalley, M. J., Gibilisco, L. & Bachtrog, D. De novo assembly of a young  
558 *Drosophila* Y chromosome using single-molecule sequencing and chromatin conformation  
559 capture. *PLoS Biol.* **16**, e2006348 (2018).
- 560 15. Carvalho, A. B., Lazzaro, B. P. & Clark, A. G. Y chromosomal fertility factors kl-2 and kl-3 of  
561 *Drosophila melanogaster* encode dynein heavy chain polypeptides. *Proc. Natl. Acad. Sci. U.S.A.* **97**,  
562 13239–13244 (2000).
- 563 16. Bachtrog, D., Hom, E., Wong, K. M., Maside, X. & de Jong, P. Genomic degradation of a young Y  
564 chromosome in *Drosophila miranda*. *Genome Biol.* **9**, R30 (2008).
- 565 17. Charlesworth, B. & Charlesworth, D. The degeneration of Y chromosomes. *Philos. Trans. R. Soc.*  
566 *Lond., B, Biol. Sci.* **355**, 1563–1572 (2000).
- 567 18. Kurtz, S. *et al.* Versatile and open software for comparing large genomes. *Genome Biol.* **5**, R12  
568 (2004).
- 569 19. Lucotte, E. A. *et al.* Dynamic Copy Number Evolution of X- and Y-Linked Ampliconic Genes in  
570 Human Populations. *Genetics* **209**, 907–920 (2018).
- 571 20. Bachtrog, D. Evidence that positive selection drives Y-chromosome degeneration in *Drosophila*  
572 *miranda*. *Nat. Genet.* **36**, 518–522 (2004).
- 573 21. Meiklejohn, C. D. & Tao, Y. Genetic conflict and sex chromosome evolution. *Trends Ecol. Evol.*

- 574 (Amst.) **25**, 215–223 (2010).
- 575 22. Konkel, M. K. & Batzer, M. A. A mobile threat to genome stability: The impact of non-LTR  
576 retrotransposons upon the human genome. *Semin. Cancer Biol.* **20**, 211–221 (2010).
- 577 23. Zhou, Q. *et al.* The epigenome of evolving Drosophila neo-sex chromosomes: dosage  
578 compensation and heterochromatin formation. *PLoS Biol.* **11**, e1001711 (2013).
- 579 24. Bachtrog, D. Expression profile of a degenerating neo-y chromosome in Drosophila. *Curr. Biol.* **16**,  
580 1694–1699 (2006).
- 581 25. Ellison, C. E. & Bachtrog, D. Dosage compensation via transposable element mediated rewiring of  
582 a regulatory network. *Science* **342**, 846–850 (2013).
- 583 26. Lucchesi, J. C. & Kuroda, M. I. Dosage compensation in Drosophila. *Cold Spring Harb Perspect Biol*  
584 **7**, a019398 (2015).
- 585 27. Alekseyenko, A. A. *et al.* Conservation and de novo acquisition of dosage compensation on newly  
586 evolved sex chromosomes in Drosophila. *Genes Dev.* **27**, 853–858 (2013).
- 587 28. Rice, W. R. Sex chromosomes and the evolution of sexual dimorphism. *Evolution* **38**, 735–742  
588 (1984).
- 589 29. Skaletsky, H. *et al.* The male-specific region of the human Y chromosome is a mosaic of discrete  
590 sequence classes. *Nature* **423**, 825–837 (2003).
- 591 30. Bellott, D. W. *et al.* Mammalian Y chromosomes retain widely expressed dosage-sensitive  
592 regulators. *Nature* **508**, 494–499 (2014).
- 593 31. Cortez, D. *et al.* Origins and functional evolution of Y chromosomes across mammals. *Nature* **508**,  
594 488–493 (2014).
- 595 32. Jaenike, J. Sex Chromosome Meiotic Drive.  
596 <http://dx.doi.org/10.1146/annurev.ecolsys.32.081501.113958> **32**, 25–49 (2003).
- 597 33. Frank, S. A. Divergence of meiotic drive-suppression systems as an explanation for sex-biased  
598 hybrid sterility and inviability. *Evolution* **45**, 262–267 (1991).
- 599 34. Tao, Y., Masly, J. P., Araripe, L., Ke, Y. & Hartl, D. L. A sex-ratio meiotic drive system in Drosophila  
600 simulans. I: an autosomal suppressor. *PLoS Biol.* **5**, e292 (2007).
- 601 35. Tao, Y. *et al.* A sex-ratio Meiotic Drive System in Drosophila simulans. II: An X-linked Distorter.  
602 *PLoS Biol.* **5**, e293 (2007).
- 603 36. Lin, C.-J. *et al.* The hpRNA/RNAi Pathway Is Essential to Resolve Intragenomic Conflict in the  
604 Drosophila Male Germline. *Dev. Cell* **46**, 316–326.e5 (2018).
- 605 37. Brashear, W. A., Raudsepp, T. & Murphy, W. J. Evolutionary conservation of Y Chromosome  
606 ampliconic gene families despite extensive structural variation. *Genome Res.* **28**, 1841–1851  
607 (2018).
- 608 38. Bellott, D. W. *et al.* Convergent evolution of chicken Z and human X chromosomes by expansion  
609 and gene acquisition. *Nature* **466**, 612–616 (2010).
- 610 39. Carvalho, A. B., Dobo, B. A., Vibranovski, M. D. & Clark, A. G. Identification of five new genes on  
611 the Y chromosome of Drosophila melanogaster. *Proc. Natl. Acad. Sci. U.S.A.* **98**, 13225–13230  
612 (2001).
- 613 40. Sturgill, D., Zhang, Y., Parisi, M. & Oliver, B. Demasculinization of X chromosomes in the  
614 Drosophila genus. *Nature* **450**, 238–241 (2007).
- 615 41. Assis, R., Zhou, Q. & Bachtrog, D. Sex-biased transcriptome evolution in Drosophila. *Genome Biol*  
616 *Evol* **4**, 1189–1200 (2012).
- 617 42. Meiklejohn, C. D., Landeen, E. L., Cook, J. M., Kingan, S. B. & Presgraves, D. C. Sex chromosome-  
618 specific regulation in the Drosophila male germline but little evidence for chromosomal dosage  
619 compensation or meiotic inactivation. *PLoS Biol.* **9**, e1001126 (2011).
- 620 43. Vibranovski, M. D., Zhang, Y. & Long, M. General gene movement off the X chromosome in the  
621 Drosophila genus. *Genome Res.* **19**, 897–903 (2009).
- 622 44. Mueller, J. L. *et al.* The mouse X chromosome is enriched for multicopy testis genes showing  
623 postmeiotic expression. *Nat. Genet.* **40**, 794–799 (2008).
- 624 45. Mueller, J. L. *et al.* Independent specialization of the human and mouse X chromosomes for the  
625 male germ line. *Nat. Genet.* **45**, 1083–1087 (2013).
- 626 46. Helleu, Q. *et al.* Rapid evolution of a Y-chromosome heterochromatin protein underlies sex

- 627 chromosome meiotic drive. *Proc. Natl. Acad. Sci. U.S.A.* **113**, 4110–4115 (2016).
- 628 47. Hurst, L. D. & Pomiankowski, A. Causes of sex ratio bias may account for unisexual sterility in  
629 hybrids: a new explanation of Haldane's rule and related phenomena. *Genetics* **128**, 841–858  
630 (1991).
- 631 48. Larson, E. L., Keeble, S., Vanderpool, D., Dean, M. D. & Good, J. M. The Composite Regulatory  
632 Basis of the Large X-Effect in Mouse Speciation. *Mol. Biol. Evol.* **34**, 282–295 (2017).
- 633 49. Phadnis, N. & Orr, H. A. A single gene causes both male sterility and segregation distortion in  
634 *Drosophila* hybrids. *Science* **323**, 376–379 (2009).
- 635 50. Lahn, B. T. & Page, D. C. A human sex-chromosomal gene family expressed in male germ cells and  
636 encoding variably charged proteins. *Hum. Mol. Genet.* **9**, 311–319 (2000).
- 637 51. Cocquet, J. *et al.* A genetic basis for a postmeiotic X versus Y chromosome intragenomic conflict in  
638 the mouse. *PLoS Genet.* **8**, e1002900 (2012).
- 639 52. Cocquet, J. *et al.* The multicopy gene Sly represses the sex chromosomes in the male mouse  
640 germline after meiosis. *PLoS Biol.* **7**, e1000244 (2009).
- 641 53. Larson, E. L., Kopania, E. E. K. & Good, J. M. Spermatogenesis and the Evolution of Mammalian Sex  
642 Chromosomes. *Trends Genet.* **34**, 722–732 (2018).
- 643 54. Balakireva, M. D., Shevelyov YuYa, Nurminsky, D. I., Livak, K. J. & Gvozdev, V. A. Structural  
644 organization and diversification of Y-linked sequences comprising Su(Ste) genes in *Drosophila*  
645 *melanogaster*. *Nucleic Acids Res.* **20**, 3731–3736 (1992).
- 646 55. Murphy, W. J. *et al.* Novel gene acquisition on carnivore Y chromosomes. *PLoS Genet.* **2**, e43  
647 (2006).
- 648 56. Ellison, C. E. & Bachtrog, D. Recurrent gene amplification on *Drosophila* Y chromosomes suggests  
649 cryptic sex chromosome drive is common on young sex chromosomes.  
650 doi:<https://doi.org/10.1101/324368>
- 651 57. Smith, A., Hubley, R. & Green, P. *RepeatMasker Open-4.0*. *RepeatMasker Open-4.0*. Available at:  
652 (Accessed: 30 August 2017)
- 653 58. Smith, A. & Hubley, R. *RepeatModeler Open-1.0*. *RepeatMasker Open-4.0*. Available at: (Accessed:  
654 30 August 2017)
- 655 59. Chu, C., Nielsen, R. & Wu, Y. REPdenovo: Inferring De Novo Repeat Motifs from Short Sequence  
656 Reads. *PLoS ONE* **11**, e0150719 (2016).
- 657 60. Bao, W., Kojima, K. K. & Kohany, O. Repbase Update, a database of repetitive elements in  
658 eukaryotic genomes. *Mob DNA* **6**, 11 (2015).
- 659 61. Kim, D., Langmead, B. & Salzberg, S. L. HISAT: a fast spliced aligner with low memory  
660 requirements. *Nat. Methods* **12**, 357–360 (2015).
- 661 62. Pertea, M. *et al.* StringTie enables improved reconstruction of a transcriptome from RNA-seq  
662 reads. *Nat. Biotechnol.* **33**, 290–295 (2015).
- 663 63. Campbell, M. S., Holt, C., Moore, B. & Yandell, M. Genome Annotation and Curation Using MAKER  
664 and MAKER-P. *Curr Protoc Bioinformatics* **48**, 4.11.1–39 (2014).
- 665 64. Stanke, M. & Waack, S. Gene prediction with a hidden Markov model and a new intron submodel.  
666 *Bioinformatics* **19 Suppl 2**, ii215–25 (2003).
- 667 65. Korf, I. Gene finding in novel genomes. *BMC Bioinformatics* **5**, 59 (2004).
- 668 66. Simão, F. A., Waterhouse, R. M., Ioannidis, P., Kriventseva, E. V. & Zdobnov, E. M. BUSCO:  
669 assessing genome assembly and annotation completeness with single-copy orthologs.  
670 *Bioinformatics* **31**, 3210–3212 (2015).
- 671 67. Camacho, C. *et al.* BLAST+: architecture and applications. *BMC Bioinformatics* **10**, 421 (2009).
- 672 68. Gel, B. & Serra, E. karyoploteR: an R/Bioconductor package to plot customizable genomes  
673 displaying arbitrary data. *Bioinformatics* **33**, 3088–3090 (2017).
- 674 69. Guy, L., Kultima, J. R. & Andersson, S. G. E. genoPlotR: comparative gene and genome visualization  
675 in R. *Bioinformatics* **26**, 2334–2335 (2010).
- 676 70. Li, H. & Durbin, R. Fast and accurate short read alignment with Burrows-Wheeler transform.  
677 *Bioinformatics* **25**, 1754–1760 (2009).
- 678 71. Li, H. *et al.* The Sequence Alignment/Map format and SAMtools. *Bioinformatics* **25**, 2078–2079  
679 (2009).

- 680 72. DePristo, M. A. *et al.* A framework for variation discovery and genotyping using next-generation  
681 DNA sequencing data. *Nat. Genet.* **43**, 491–498 (2011).  
682 73. Danecek, P. *et al.* The variant call format and VCFtools. *Bioinformatics* **27**, 2156–2158 (2011).  
683 74. Huson, D. H. & Bryant, D. Application of phylogenetic networks in evolutionary studies. *Mol. Biol.*  
684 *Evol.* **23**, 254–267 (2006).  
685 75. Buchfink, B., Xie, C. & Huson, D. H. Fast and sensitive protein alignment using DIAMOND. *Nat.*  
686 *Methods* **12**, 59–60 (2015).  
687 76. Quinlan, A. R. & Hall, I. M. BEDTools: a flexible suite of utilities for comparing genomic features.  
688 *Bioinformatics* **26**, 841–842 (2010).  
689 77. Katoh, K. & Standley, D. M. MAFFT multiple sequence alignment software version 7:  
690 improvements in performance and usability. *Mol. Biol. Evol.* **30**, 772–780 (2013).  
691 78. Stamatakis, A. RAxML version 8: a tool for phylogenetic analysis and post-analysis of large  
692 phylogenies. *Bioinformatics* **30**, 1312–1313 (2014).  
693 79. Bray, N. L., Pimentel, H., Melsted, P. & Pachter, L. Near-optimal probabilistic RNA-seq  
694 quantification. *Nat. Biotechnol.* **34**, 525–527 (2016).  
695 80. Eden, E., Navon, R., Steinfeld, I., Lipson, D. & Yakhini, Z. GOzilla: a tool for discovery and  
696 visualization of enriched GO terms in ranked gene lists. *BMC Bioinformatics* **10**, 48 (2009).  
697 81. Supek, F., Bošnjak, M., Škunca, N. & Šmuc, T. REVIGO summarizes and visualizes long lists of gene  
698 ontology terms. *PLoS ONE* **6**, e21800 (2011).  
699 82. Langmead, B. & Salzberg, S. L. Fast gapped-read alignment with Bowtie 2. *Nat. Methods* **9**, 357–  
700 359 (2012).  
701 83. Ramírez, F., Dündar, F., Diehl, S., Grüning, B. A. & Manke, T. deepTools: a flexible platform for  
702 exploring deep-sequencing data. *Nucleic Acids Res.* **42**, W187–91 (2014).  
703 84. Quinlan, A. R. BEDTools: The Swiss-Army Tool for Genome Feature Analysis. *Curr Protoc*  
704 *Bioinformatics* **47**, 11.12.1–34 (2014).  
705

706  
707 **Acknowledgements.** Funded by NIH grants (R01GM076007, GM101255 and R01GM093182) to DB. We  
708 thank L. Gibilisco for generating small RNA libraries and K. Chatla and A. Tran for generating genomic  
709 libraries.

710  
711 **Competing interests.** The authors declare that no competing interests exist.

712  
713 **Data availability:** BioProject ID PRJNA545539 and Dryad.

## 714 715 716 **Figure legends**

717  
718 **Figure 1. Gene content evolution of newly formed sex chromosomes. A.** Karyotype and gene content  
719 evolution on the neo-sex chromosomes of *D. miranda*. Shown are the karyotype of *D. miranda*, and its  
720 close relative *D. pseudoobscura*, from which it diverged about 2MY ago. In *D. miranda*, the fusion of an  
721 autosome (chromosome 3) with the Y chromosome created the neo-sex chromosomes, about 1.5 MY ago.  
722 Shown along the tree are numbers of gene amplifications (in green) and gene losses (in red) of genes  
723 ancestrally present on chr3, on the neo-X and neo-Y chromosomes, assuming parsimony. X chromosomes  
724 are shown in red, Y chromosomes in blue, and autosomes in black. **B.** Schematic representation of gene  
725 content of the *D. miranda* neo-Y/Y chromosome. The *D. miranda* neo-Y/Y contains different types of  
726 genes: our annotation contains 1736 ancestral single-copy genes; 1697 multi-copy Y genes that are  
727 derived from 363 distinct proteins that were ancestrally present on the neo-Y, and 2036 genes that are  
728 derived from 94 distinct proteins that were ancestrally present on the autosome that formed the neo-sex  
729 chromosome and that co-amplified on both the X/neo-X and Y/neo-Y. “Others” refers to genes not  
730 present or mapping to an unknown location in *D. pseudoobscura* (446 genes), or genes with complex  
731 mapping (513 genes; see Methods). **C.** Pie charts show the assignment of genes on the neo-Y/Y or neo-X

732 to these different categories (using the same color scheme as in panel B), with the size of the pie scaled by  
733 the number of genes on the neo-Y/Y or neo-X. **D.** Co-amplified X/Y genes typically exists as tandem  
734 repeats on the X and the Y chromosomes. Shown are a subset of 18 co-amplified X/Y gene families with  
735 meiosis and siRNA functions.

736

737 **Figure 2. Distinct evolutionary processes may drive the accumulation of multi-copy Y genes, or co-**  
738 **amplified X and Y genes. A.** Amplified Y genes may have no fitness benefits or be slightly deleterious.  
739 Repeats on the neo-Y can provide a substrate for non-allelic homologous recombination and promote  
740 gene family expansion (i). Gene duplicates may be silenced by spreading heterochromatin on the neo-Y,  
741 and thus less deleterious (ii). **B.** Multi-copy Y genes may provide fitness benefits to males, either through  
742 compensating for reduced gene dose of neo-Y genes (i) or by contributing to male fertility (ii). **C.** Co-  
743 amplified X/Y genes may be involved in an intergenomic conflict over segregation, and invoke the RNAi  
744 pathway to trigger silencing of meiotic drivers.

745

746 **Figure 3. Characterization of ampliconic Y genes. A.** Expression of multi-copy Y genes (top, purple  
747 shading) and co-amplified Y genes (bottom, green shading) in different male *D. miranda* samples, and  
748 tissue-specificity index. Genes are sorted by their copy number on the Y, and the tissue-specificity index, *T*  
749 is calculated as described in Methods. Multi-copy Y genes with high copy number are primarily expressed  
750 in testis, while gene families with low copy number are expressed in multiple tissues. The Z-Scores are  
751 calculated by scaling the rows to have 0 median and a standard deviation of 1. The data shown in panel A  
752 are presented in **Data Supplement 6. B.** List of top amplified multi-copy Y genes (i.e. high copy number Y  
753 genes), their copy number on the Y, and tissue of highest expression on *D. pseudoobscura* (as a proxy for  
754 ancestral expression). **C.** Dosage compensation status of neo-X homologs of single-copy (left) and multi-  
755 copy (right) Y genes. Shown are the relative numbers of neo-X genes that are bound by the MSL-complex  
756 (i.e. that are dosage compensated), and those not bound (i.e. not dosage compensated). MSL-binding  
757 data were generated for male *D. miranda* larvae (28). Genes with multiple copies on the Y are less likely to  
758 be dosage compensated on the X. The data in panel C are presented in **Data Supplement 7. D.** List of top  
759 co-amplified X/Y genes with well-characterized roles in meiosis or siRNA, their copy number, and inferred  
760 function in *D. melanogaster*.

761

762 **Figure 4. Co-amplified X/Y genes are enriched for meiosis-related and RNAi functions. A.** “Interactive  
763 graph” view of enriched GO terms. Bubble color indicates the *p*-value; bubble size indicates the frequency  
764 of the GO term in the underlying GO database. Highly similar GO terms are linked by edges in the graph,  
765 where the line width indicates the degree of similarity. **B.** “TreeMap” view of enriched GO terms. Each  
766 rectangle is a single cluster representative. The representatives are joined into ‘superclusters’ of loosely  
767 related terms, visualized with different shades of gray. Size of the rectangles reflect the *p*-value of the GO  
768 term.

769

770 **Figure 5. Co-amplified X/Y gene families produce anti-sense transcripts and small RNAs in testis.** The 94  
771 co-amplified gene families are sorted by copy number on the Y in panels A-E. **A.** Copy numbers on the Y  
772 and X chromosomes for co-amplified gene families in *D. miranda*. The data shown in panel A are  
773 presented in **Data Supplement 8. B.** Tissue expression patterns for co-amplified X and Y genes in *D.*  
774 *miranda* male tissues. Co-amplified X/Y genes are highly expressed in testis. The Z-Scores are calculated  
775 by scaling the rows to have 0 mean and standard deviation 1. The data shown in panel B are presented in  
776 **Data Supplement 9. C.** Tissue expression patterns of homologs of co-amplified X/Y genes in *D.*  
777 *pseudoobscura*. Homologs of co-amplified X/Y genes are highly expressed in testis and ovaries, suggesting  
778 an ancestral function in gametogenesis. The Z-Scores are calculated by scaling rows to have 0 mean and  
779 standard deviation 1. The data shown in panel C are presented in **Data Supplement 10. D.** Sense- and  
780 anti-sense transcription of total RNA for co-amplified X and Y genes in *D. miranda* testis. Shown are testis  
781 total RNA counts derived from sense and antisense transcripts. The data shown in panel D are presented  
782 in **Data Supplement 11. E.** Sense- and anti-sense counts of small RNA for co-amplified X and Y genes in *D.*  
783 *miranda* testis. Shown are testis small RNA counts derived from sense and antisense transcripts. The data  
784 shown in panel E are presented in **Data Supplement 12. F.** Fraction of sense and anti-sense transcripts



785 produced for different categories of genes on the X/neo-X and Y/neo-Y chromosome (i.e. ancestral single-  
786 copy Y and X genes; multi-copy Y/neo-Y genes and their neo-X gametologs; genes co-amplified on the  
787 Y/neo-Y and X/neo-X). The data shown in panel E are presented in **Data Supplement 13. G.** Enrichment of  
788 small RNAs mapping to co-amplified X and Y genes. Shown are testis small RNA counts (normalized by  
789 total gene length for all copies of a gene family) for different categories of genes on the X/neo-X and  
790 Y/neo-Y chromosome (i.e. ancestral single-copy Y and X genes; multi-copy Y/neo-Y genes and their neo-X  
791 gametologs; genes co-amplified on the Y/neo-Y and X/neo-X). The Wilcoxon test p-value significance is  
792 denoted by asterisks. The upper whisker and lower whisker in the boxplots show the 75th percentile + 1.5  
793 times the interquartile range and the 25th percentile - 1.5 times the inter-quartile range, respectively. The  
794 data shown in panel G are presented in **Data Supplement 14.**

795  
796 **Figure 6.** Examples of co-amplified X and Y genes. Shown are the genomic architecture of co-amplified  
797 gene families on the neo-X and neo-Y (repetitive regions are displayed in yellow, and co-amplified genes  
798 in green, other genes in gray), and expression profiles from testis (stranded RNA-seq and small RNA  
799 profiles in red for the neo-X and blue for the neo-Y). For each gene (**A. *fest***; **B. *mars***; **C. *zip***), only a  
800 representative subset of copies is shown.

801  
802  
803 **Table S1.** Gene loss on the different Muller elements of *D. miranda*. Shown are genes in *D. pseudoobscura*  
804 for different chromosomes that are absent on their homologous chromosome arm in *D. miranda*. The  
805 table gives *D. pseudoobscura* gene ID (FBgn), *D. melanogaster* ortholog, the chromosomal location of the  
806 gene in *D. pseudoobscura*, the tissue of highest expression in *D. pseudoobscura*, the category of the gene,  
807 and whether the gene is present somewhere else in the *D. miranda* genome.

808  
809 **Table S2.** Overview of multi-copy Y genes. Shown are total copy numbers for multi-copy Y genes, as well  
810 as the number of full-length (>90%) and partial Y copies (50-90%; 25-50%; and less than 25% compared to  
811 the length of the orthologous gene in *D. pseudoobscura*). The expression spreadsheet shows expression of  
812 orthologs of multi-copy Y genes in *D. pseudoobscura*, and the GO analysis shows the orthologous genes in  
813 *D. melanogaster*. No significant GO enrichment terms were detected.

814  
815 **Table S3.** Overview of co-amplified X/Y genes. . Shown are total copy number for co-amplified X and Y  
816 genes, as well as the numbers of full-length (>90%) and partial X and Y copies (50-90%; 25-50%; and less  
817 than 25% compared to the length of the orthologous gene in *D. pseudoobscura*). The expression  
818 spreadsheets show expression of orthologs of co-amplified X/Y genes in *D. pseudoobscura* and *D.*  
819 *melanogaster*, and GO analysis shows the orthologous genes in *D. melanogaster* and GO terms that were  
820 significantly enriched among co-amplified X/Y genes (using either Gorilla or PantherDB).

821  
822 **Table S4.** Expression of individual copies of multi-copy Y genes and co-amplified X/Y genes. Shown is the  
823 inferred fraction of individual gene copies expressed, depending on different cut-offs.

824  
825 **Table S5.** Genome intervals of clustered (within 100kb of each other) multi-copy genes and their  
826 *Drosophila pseudoobscura* gene ID (FBgn).

827  
828 **Table S6.** Genome intervals of clustered (within 100kb of each other) co-amplified genes and their  
829 *Drosophila pseudoobscura* gene ID (FBgn).

830  
831 **Table S7.** Y-chromosome replacement lines used in the study. Shown is the collection location for the  
832 different Y chromosome replacement lines generated.

833  
834 **Table S8.** Small RNA mapping from testis, for single copy X and Y genes, multi-copy Y genes and their X  
835 homologs, and co-amplified X and Y genes

836  
837 **Table S9.** Sequence data generated and SRA accession numbers.

838  
839  
840  
841  
842  
843  
844  
845  
846  
847  
848  
849  
850  
851  
852  
853  
854  
855  
856  
857  
858  
859  
860  
861  
862  
863  
864  
865  
866  
867  
868  
869  
870  
871  
872  
873  
874  
875  
876  
877  
878  
879  
880  
881  
882  
883  
884  
885  
886  
887  
888  
889  
890

**Figure S1. Validation of multi-copy and co-amplified Y genes in the *D. miranda* genome assembly using Illumina read coverage analysis from the reference strain (MSH22).** Shown is the gene copy number from the genome assembly and the estimated copy number based on read mapping to A) multi-copy genes (Pearson correlation = 0.82) and B) co-amplified genes (Pearson correlation = 0.84) with the 1:1 line shown. Zoomed in regions for multi-copy and co-amplified genes are shown in C) and D). Note that our coverage analysis typically underestimates the number of Y-linked copies found in the assembly, presumably due to many multi-copy genes being fragmented in the assembly.

**Figure S2. Location of multi-copy Y genes.** The genomic coordinates of genes identified as multi-copy on the two largest Y chromosome scaffolds (Y1 and Y2) and their corresponding single copy location on the neo-X (Muller C). Most multi-copy genes on the Y exist in tandem and therefore there is a substantial overlap of plotting lines. Note that the Y/neo-Y chromosomes in our current assembly in *D. miranda* consists of three major scaffolds (Y1, Y2, Y3, with Y3 possibly corresponding to the ancestral Y).

**Figure S3. Location of orthologs of multi-copy Y genes and co-amplified X/Y genes in *D. pseudoobscura* and *D. miranda*.** Each line shows the location of the ortholog of a co-amplified X/Y gene (in blue), or a multi-copy Y gene (in orange) along *D. pseudoobscura* chr3, or the neo-X of *D. miranda*. Of the 363 multi-copy genes identified on the Y/neo-Y of *D. miranda*, 349 are located on chr3 of *D. pseudoobscura*, 2 genes are on chr2, 7 genes with unknown location, 1 gene on XL, and 4 genes on XR. Of the 94 co-amplified X/Y genes, 59 are located on chr3 of *D. pseudoobscura*, 4 genes are on chr2, 1 gene on chr4, 16 genes with unknown location, 6 genes on XL, and 8 genes on XR.

**Figure S4. Phylogenetic relationships of co-amplified genes in *D. miranda*.** Maximum-likelihood trees of *D. miranda* X and Y gene copies with nodes showing >70 bootstrap support highlighted with black circles. X-linked copies are shown in red, Y-linked copies shown in blue, with distinct X and Y groupings collapsed. Fasta alignments are in **Data Supplement 15**.

**Figure S5. Properties of Y-chromosome replacement lines.** A) Individual nucleotide diversity ( $\pi$ ) shown for each replacement line. Peaks identify regions of residual heterozygosity in each Y-chromosome replacement line. B) Phylogenetic networks of autosomal SNPs of the seven Y-chromosome replacement lines and three lines from which some Y chromosomes were derived. As expected, all Y replacement lines cluster with MSH22. C) Phylogenetic network of SNPs showing seven distinct Y types.

**Figure S6.** Copy number estimates for co-amplified Y genes, multi-copy Y genes, and multi-copy autosome and X genes. For co-amplified Y genes we show all genes that were identified as co-amplified. For the multi-copy Y genes we only show genes with >3 copies on the Y. For multi-copy autosome and X genes we show only genes with >4 total copies. Multi-copy autosome and X estimates are predicted to be highly similar given that the autosome and X background in each Y-chromosome replacement line is nearly identical. Slight deviations are likely due to stochasticity in sequencing and read mapping, residual heterozygosity in the MSH22 line, or unique Y chromosome gene amplifications.

**Figure S7.** Repeats may contribute to accumulation of multi-copy genes. Transposable elements often flank multi-copy Y genes, and may have contributed to amplification of genes on the X and Y. Genes are shown in green, and TEs are shown in gray.

**Figure S8.** Expression patterns of X- and Y-linked genes for **A.** single-copy X- and Y-linked genes; **B.** multi-copy Y-linked genes and their X homologs; **C.** co-amplified X and Y genes. Expression for individual gene copies is shown. Expression values were row-normalized to obtain Z-scores with a mean of 0 and standard deviation of 1, using the built-in scale = 'row' argument in the heatmap.2 function from the package gplots in R. The data shown are presented in **Data Supplement 16**.



891 **Figure S9.** Expression patterns of X- and Y-linked genes for **A.** single-copy X- and Y-linked genes; **B.** multi-  
892 copy Y-linked genes and their X homologs; **C.** co-amplified X and Y genes. Total summed expression for all  
893 gene copies of a gene family is shown. Expression values were row-normalized to obtain Z-scores with a  
894 mean of 0 and standard deviation of 1, using the built-in scale = 'row' argument in the heatmap.2 function  
895 from the package gplots in R. The data shown are presented in **Data Supplement 17.**

896  
897 **Figure S10.** Tissues-specific expression patterns of orthologs of co-amplified X/Y genes in *D. melanogaster*.  
898 FPKM values were downloaded from flybase.org. The data shown are presented in **Data Supplement 18.**  
899

900  
901 **Data Supplements (submitted on dryad)**

902 Data Supplement 1. Repeat library used for masking the *D. miranda* genome (fasta file).

903  
904 Data Supplement 2 Repeat annotation of the *D. miranda* genome (gff file).

905  
906 Data Supplement 3 Gene annotation (all genes) of the *D. miranda* genome (gff file).

907  
908 Data Supplement 4 Gene annotation of multi-copy Y genes and their orthologs in the *D. miranda* genome  
909 (gff file).

910  
911 Data Supplement 5 Gene annotation of co-amplified X and Y genes in the *D. miranda* genome (gff file).

912  
913 Data Supplement 6. Gene expression values (TPM) for multi-copy Y genes, and co-amplified Y genes, in  
914 different *Drosophila miranda* male tissues, and tissue-specificity index tau.

915  
916 Data Supplement 7. MSL ChIP and Input counts (normalized to library size) for neo-X genes whose  
917 homolog is classified as single-copy or multi-copy Y/neo-Y.

918  
919 Data Supplement 8. Gene copy numbers for co-amplified X/Y genes.

920  
921 Data Supplement 9. Gene expression values (TPM) for co-amplified X and Y gene families, in different  
922 *Drosophila miranda* male tissues.

923  
924 Data Supplement 10. Gene expression values (FPKM) for orthologs of co-amplified X/Y genes in different  
925 *Drosophila pseudoobscura* male and female tissues.

926  
927 Data Supplement 11. Sense and anti-sense testis total RNA summed counts for co-amplified genes.

928  
929 Data Supplement 12. Sense and anti-sense testis small RNA summed counts for co-amplified genes.

930  
931 Data Supplement 13. Testis total RNA counts for all copies of a gene family for different categories of  
932 genes on the X/neo-X and Y/neo-Y chromosome.

933  
934 Data Supplement 14. Testis small RNA raw counts for different categories of genes on the X/neo-X and  
935 Y/neo-Y chromosome .

936  
937 Data Supplement 15. Fasta alignment of co-amplified X/Y genes and their *D. pseudoobscura* ortholog.

938  
939 Data Supplement 16. Gene expression values (TPM) for single-copy Y genes, multi-copy Y genes, and co-  
940 amplified Y genes, and their neo-X/X homologs in different *Drosophila miranda* tissues. Expression values  
941 for all copies of a gene family are shown individually.  
942

943

944 Data Supplement 17. Gene expression values (TPM) for multi-copy Y genes, and co-amplified X and Y  
945 genes in different *Drosophila miranda* tissues. Expression values for all copies of a gene family are  
946 summed.

947

948 Data Supplement 18. Gene expression values (FPKM) for orthologs of co-amplified X/Y genes in different  
949 *Drosophila melanogaster* tissues.

950

951

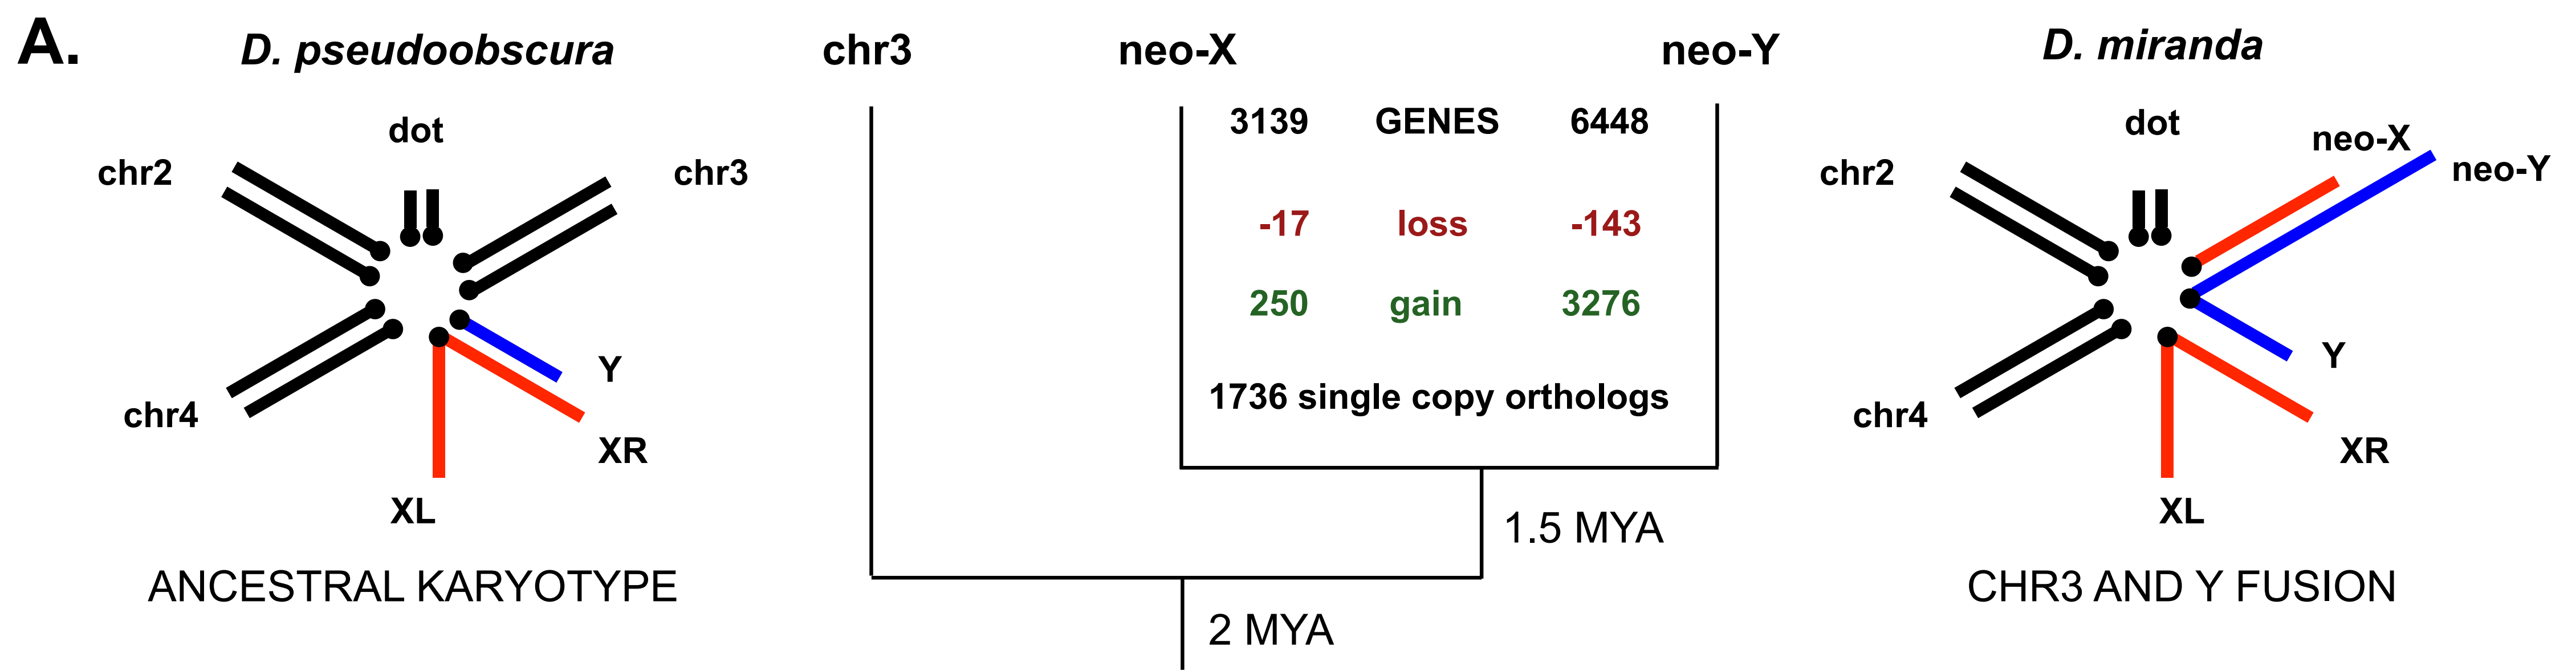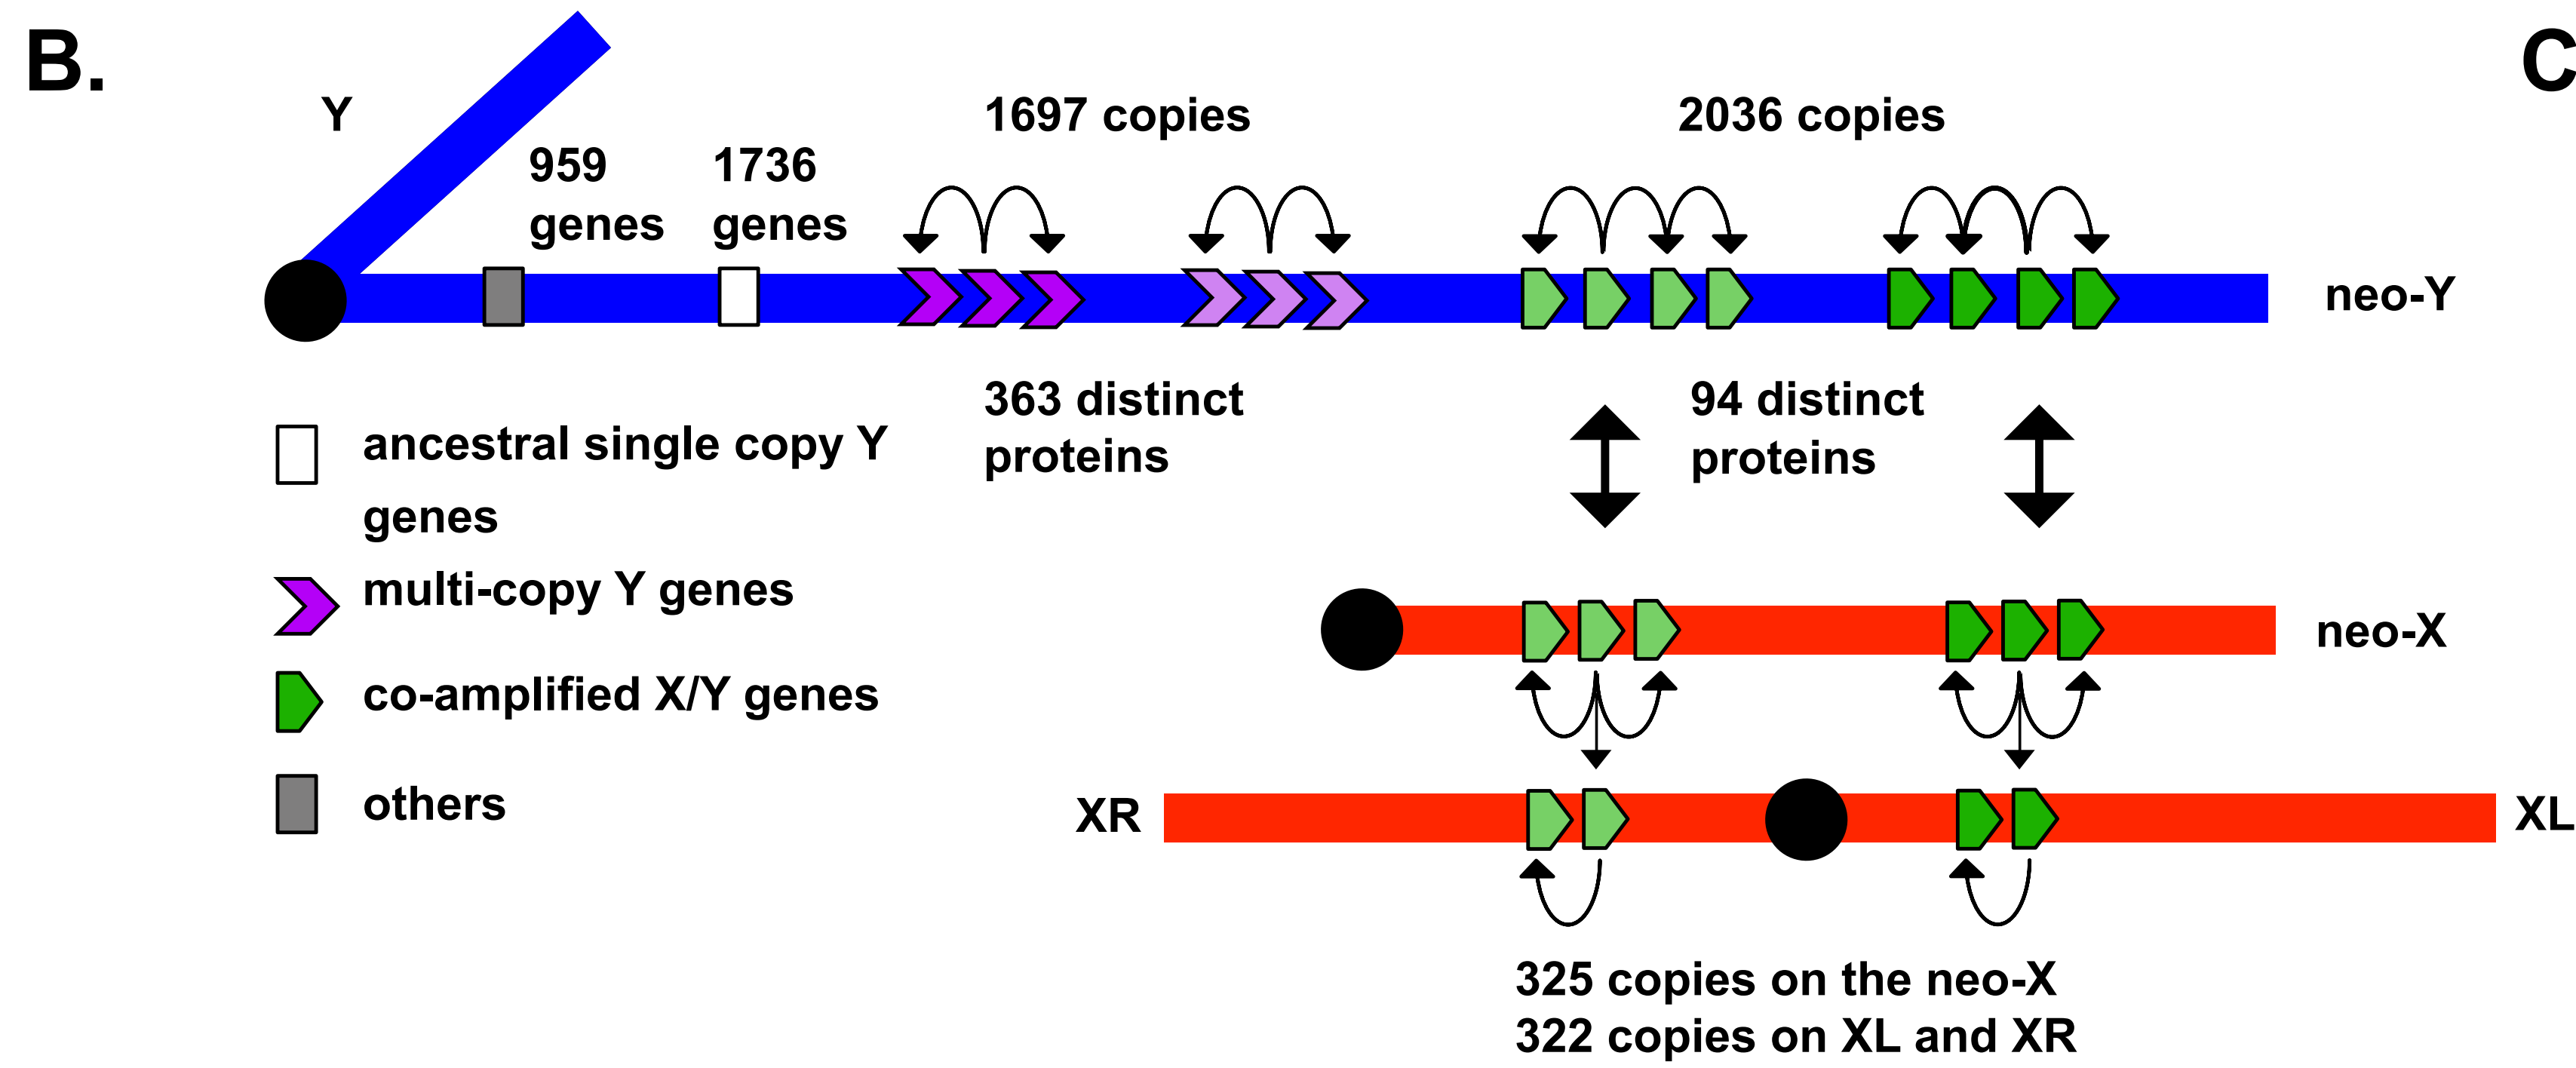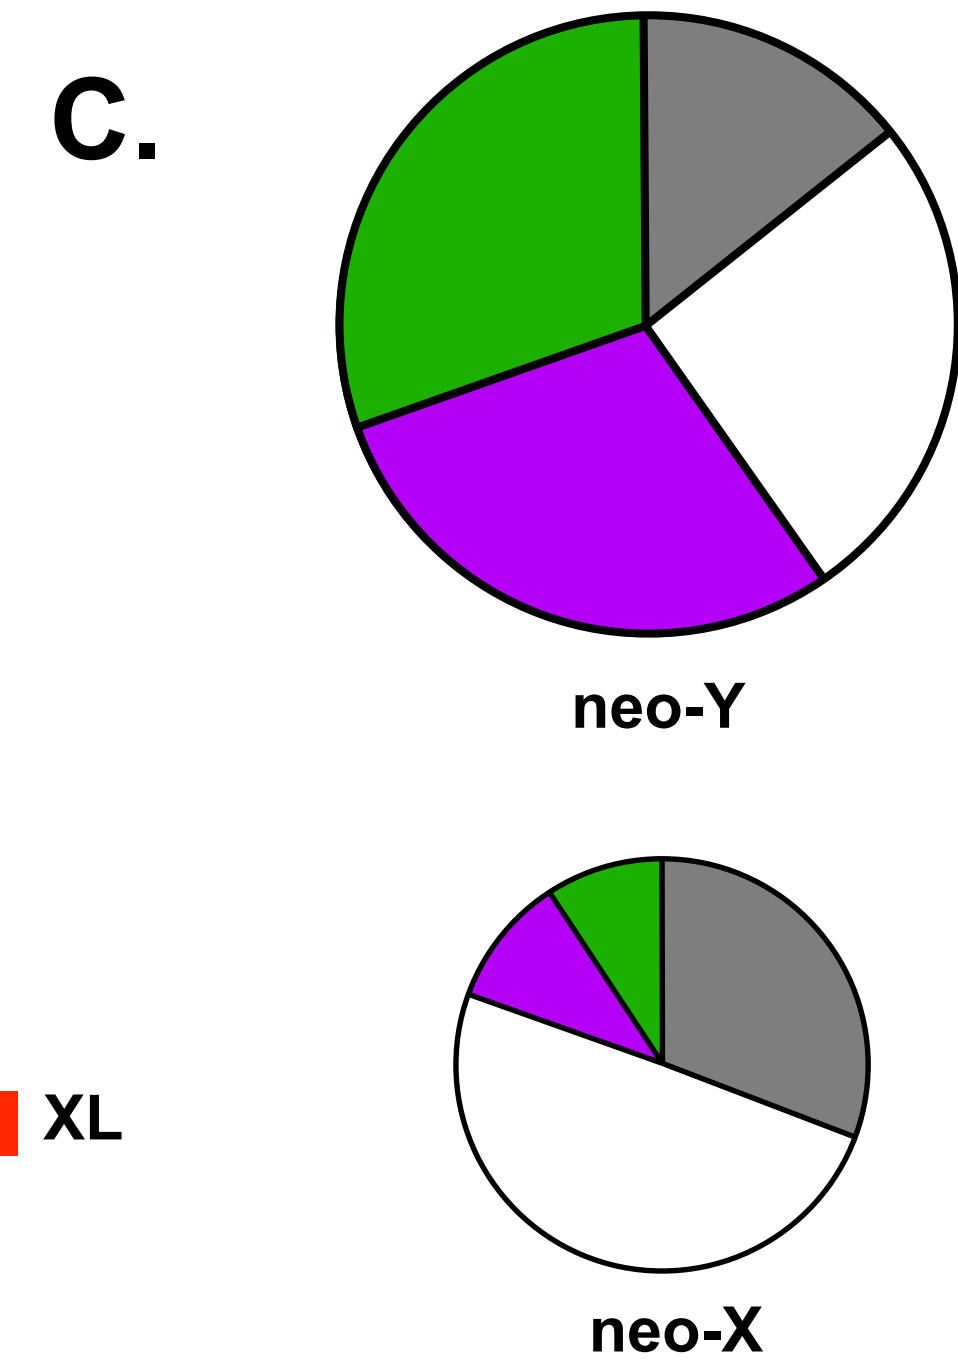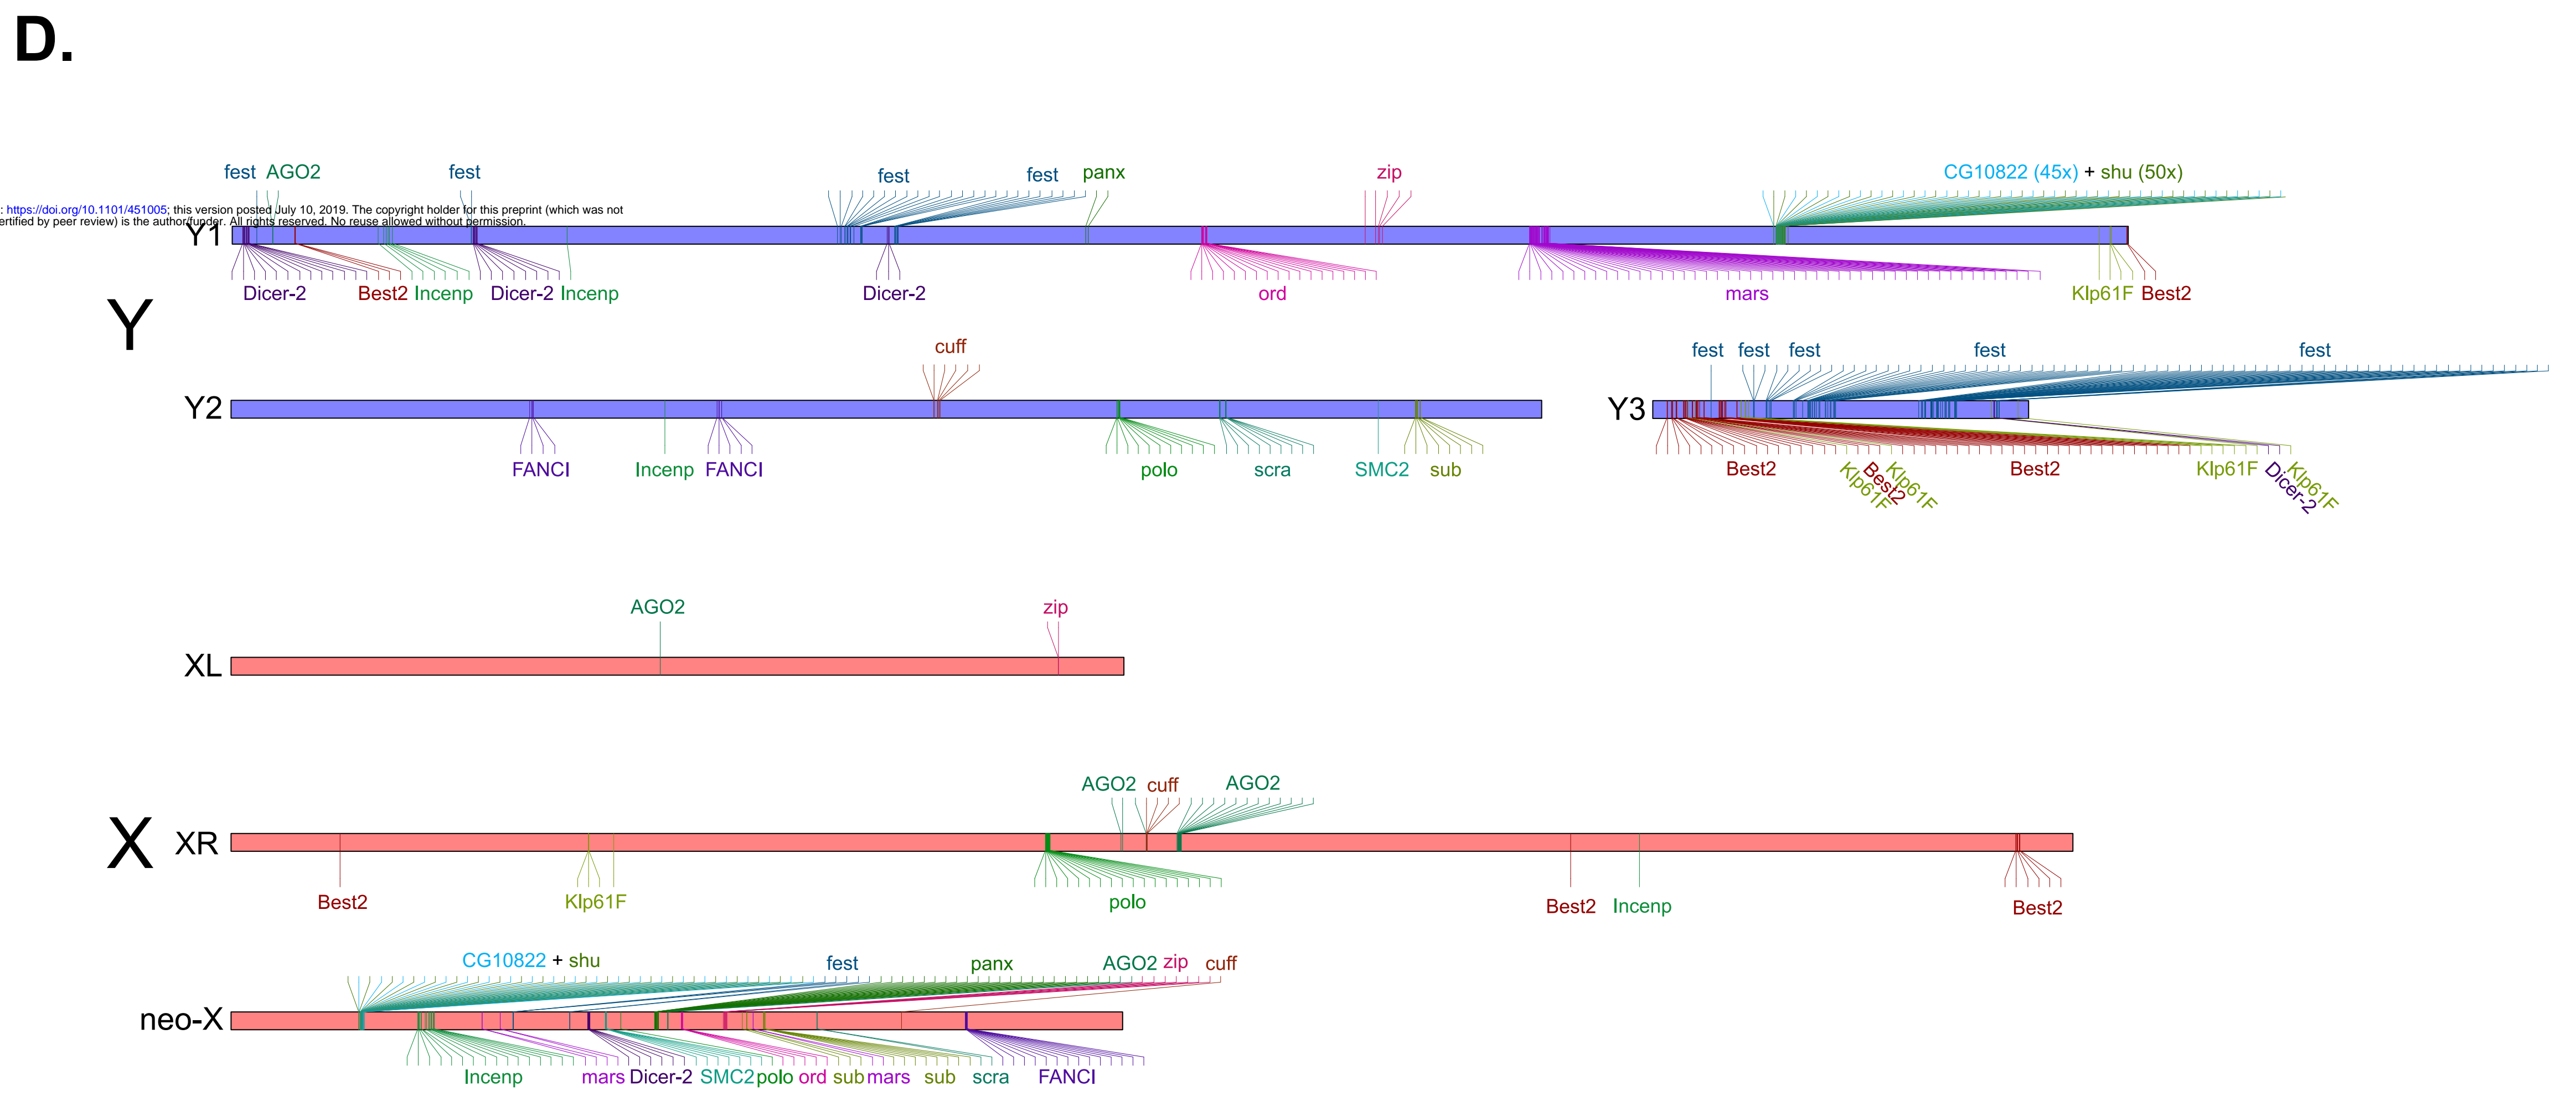

## A. Neutral/Slightly deleterious

i. Increased mutation rate

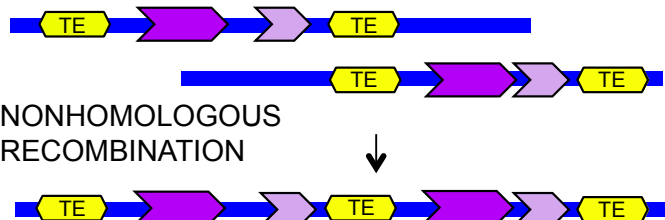

ii. Epigenetic repression

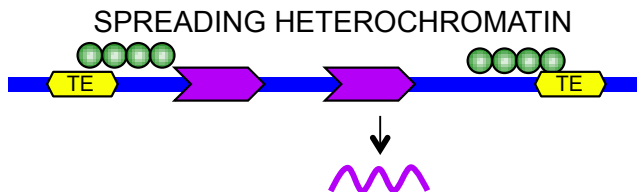

## B. Male beneficial

i. Dosage Compensation

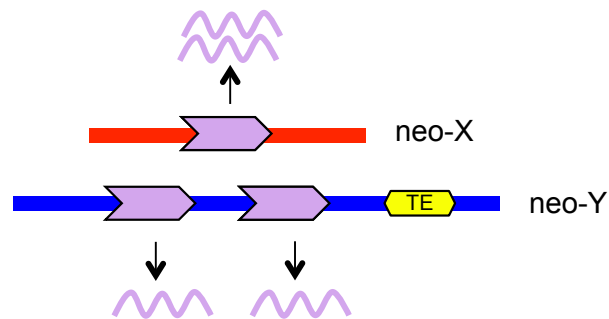

ii. High testis expression

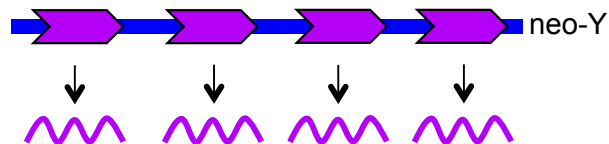

## B. Meiotic conflict

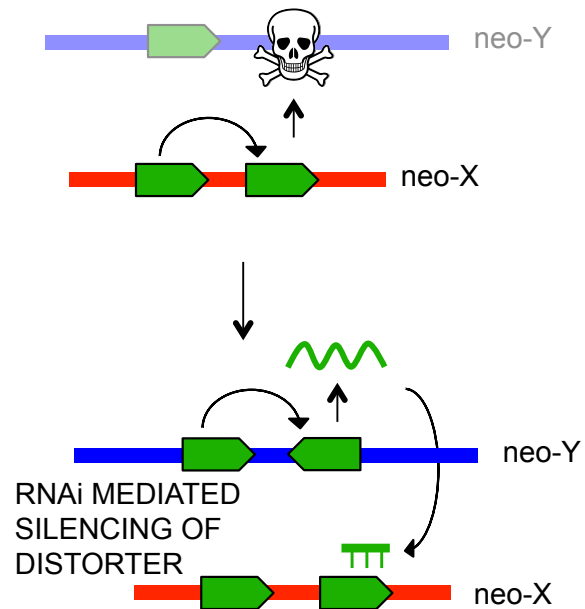

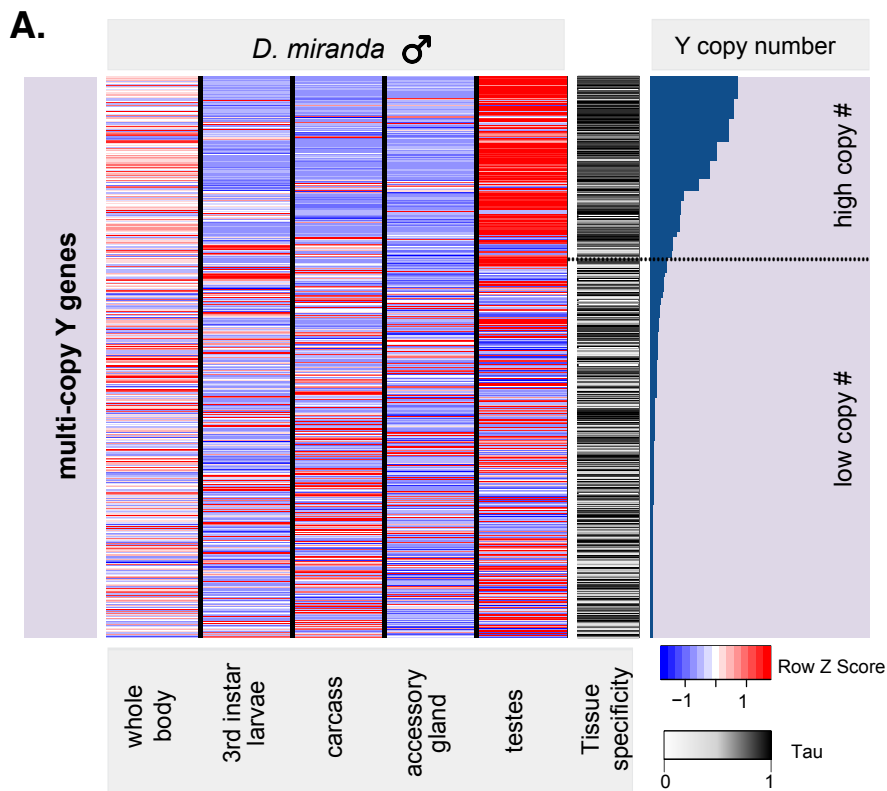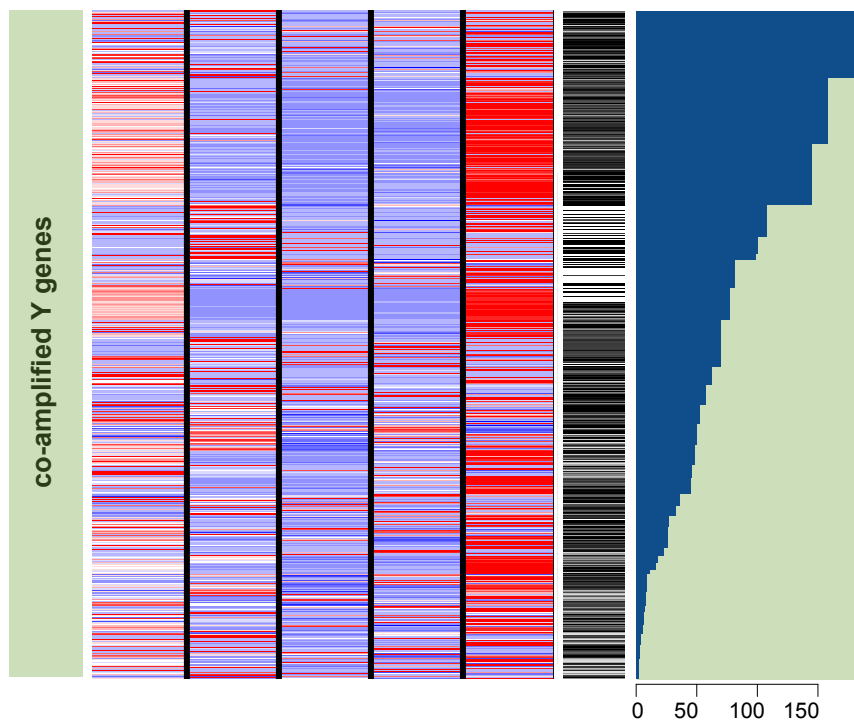

**B. High copy number multi-copy Y genes**

| <i>D. melanogaster</i> ortholog | Copy # | Highest expression in <i>D. pseudoobscura</i> |
|---------------------------------|--------|-----------------------------------------------|
| CG15657                         | 72     | testis                                        |
| Hmg-2                           | 69     | ovary                                         |
| fand                            | 65     | ovary                                         |
| RhoGAP54D                       | 55     | ovary                                         |
| Drak                            | 49     | ovary                                         |
| CG16787                         | 40     | testis                                        |
| thr                             | 28     | ovary                                         |
| Cap-G                           | 25     | ovary                                         |
| CG14490                         | 25     | NA                                            |
| CG3955                          | 24     | adult male head                               |
| CG13326                         | 24     | testis                                        |
| CG14154                         | 22     | testis                                        |
| sand                            | 19     | testis & ovary                                |
| Dg                              | 19     | ovary                                         |
| Cg30460                         | 18     | adult male                                    |

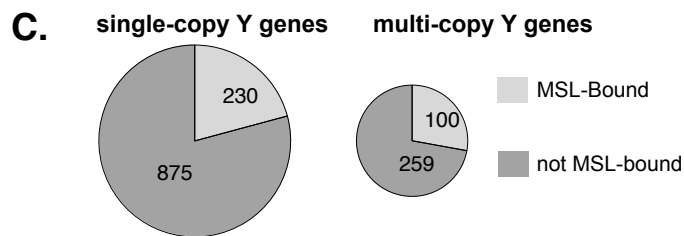

**D. Co-amplified X/Y genes with meiosis and siRNA functions**

| <i>D. melanogaster</i> ortholog | X copy # | Y copy # | Function                                                           |
|---------------------------------|----------|----------|--------------------------------------------------------------------|
| polo                            | 37       | 11       | meiotic spindle assembly                                           |
| shu                             | 22       | 50       | piRNA biogenesis                                                   |
| CG10822                         | 22       | 45       | microtubule-based movement                                         |
| panx                            | 22       | 2        | piRNA-guided silencing                                             |
| AGO2                            | 18       | 2        | siRNA interaction/ RISC                                            |
| Incpn                           | 17       | 8        | microtubule binding, meiotic chromosome condensation               |
| FANCI                           | 12       | 9        | DNA polymerase binding                                             |
| subito                          | 11       | 8        | spindle organization, chromosome segregation                       |
| zip                             | 9        | 5        | ATP binding, ATPase activity                                       |
| Best2                           | 9        | 70       | chloride channel activity                                          |
| cuff                            | 9        | 7        | production of siRNA, piRNA metabolic process                       |
| Klp61F                          | 8        | 27       | microtubule binding, microtubule motor activity                    |
| SMC2                            | 7        | 3        | chromosome condensation                                            |
| Dicer-2                         | 6        | 26       | RNAi pathway                                                       |
| mars                            | 6        | 48       | spindle organization, kinetochore assembly, chromosome segregation |
| ord                             | 5        | 18       | meiotic sister chromatid cohesion, chromosome segregation          |
| fest                            | 5        | 145      | spindle assembly involved in male meiosis                          |
| scra                            | 2        | 9        | microtubule binding                                                |

**A.**

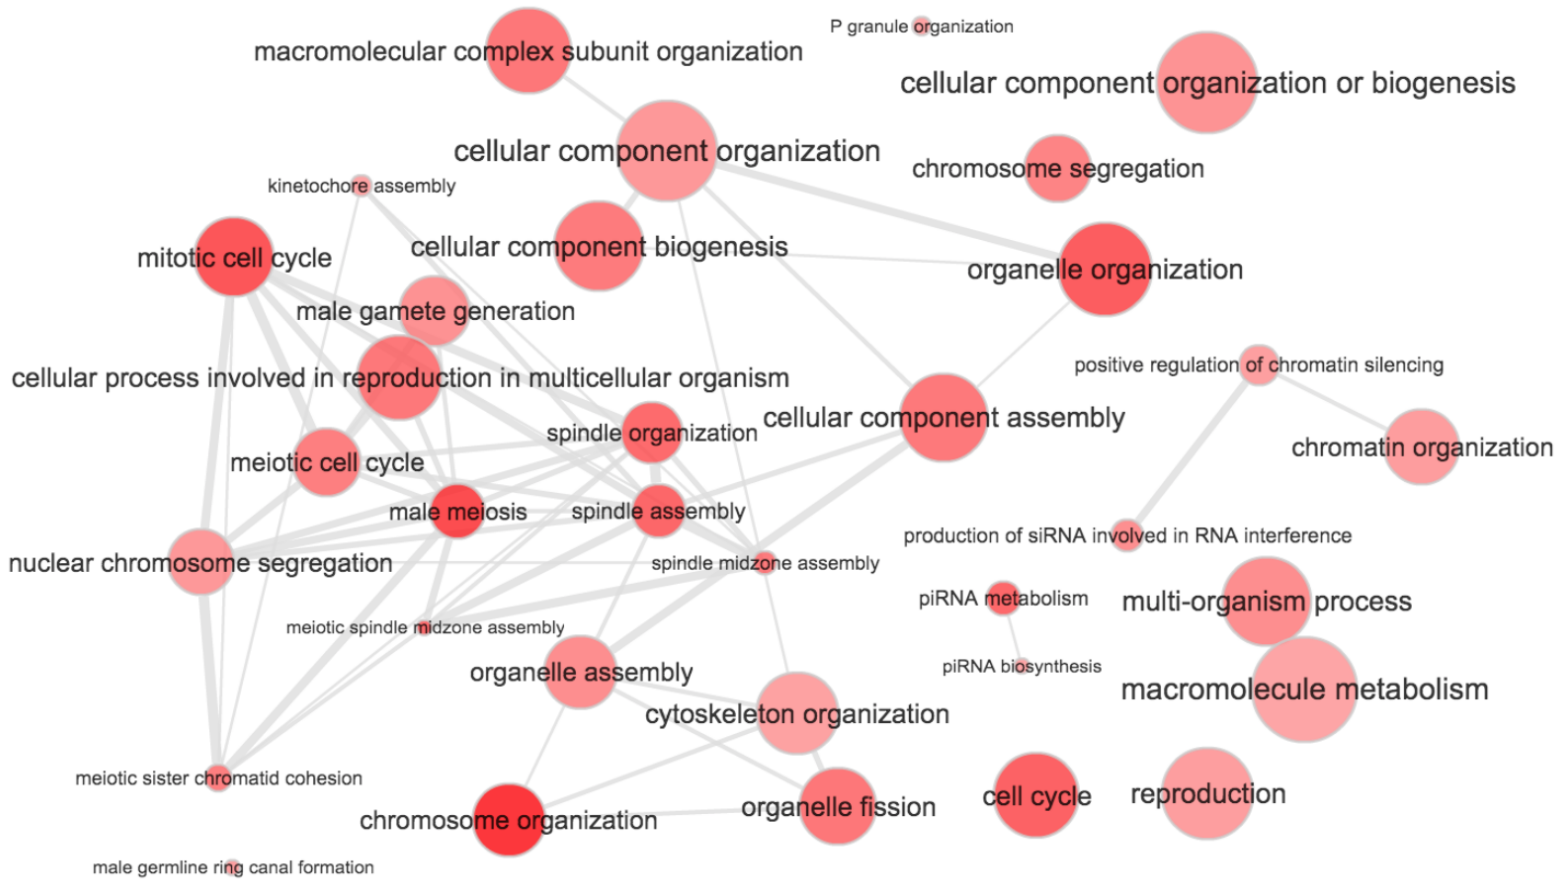

**B.**

|                         |                                  |                                             |                                                                      |                           |                                    |                                                      |                                            |                                 |
|-------------------------|----------------------------------|---------------------------------------------|----------------------------------------------------------------------|---------------------------|------------------------------------|------------------------------------------------------|--------------------------------------------|---------------------------------|
| chromosome organization | spindle assembly                 | macromolecular complex subunit organization | cellular process involved in reproduction in multicellular organisms |                           | cellular component assembly        | piRNA metabolic process                              | positive regulation of chromatin silencing |                                 |
|                         |                                  | <b>chromosome organization</b>              |                                                                      |                           |                                    | <b>piRNA metabolism</b>                              |                                            | macromolecule metabolic process |
| male meiosis            | meiotic spindle midzone assembly | spindle midzone assembly                    | meiotic cell cycle                                                   | organelle assembly        | male gamete generation             | production of siRNA involved in RNAi                 | piRNA biosynthetic process                 |                                 |
| mitotic cell cycle      | spindle organization             | cellular component biogenesis               | nuclear chromosome segregation                                       | chromatin organization    | male germline ring canal formation | <b>chromosome segregation</b>                        |                                            | <b>multi-organism process</b>   |
|                         |                                  |                                             |                                                                      | cytoskeleton organization |                                    | cell cycle                                           | chromosome segregation                     |                                 |
| organelle organization  | organelle fission                | meiotic sister chromatid cohesion           | cellular component organization                                      | kinetochore assembly      | P granule organization             | <b>cellular component organization or biogenesis</b> |                                            | <b>reproduction</b>             |



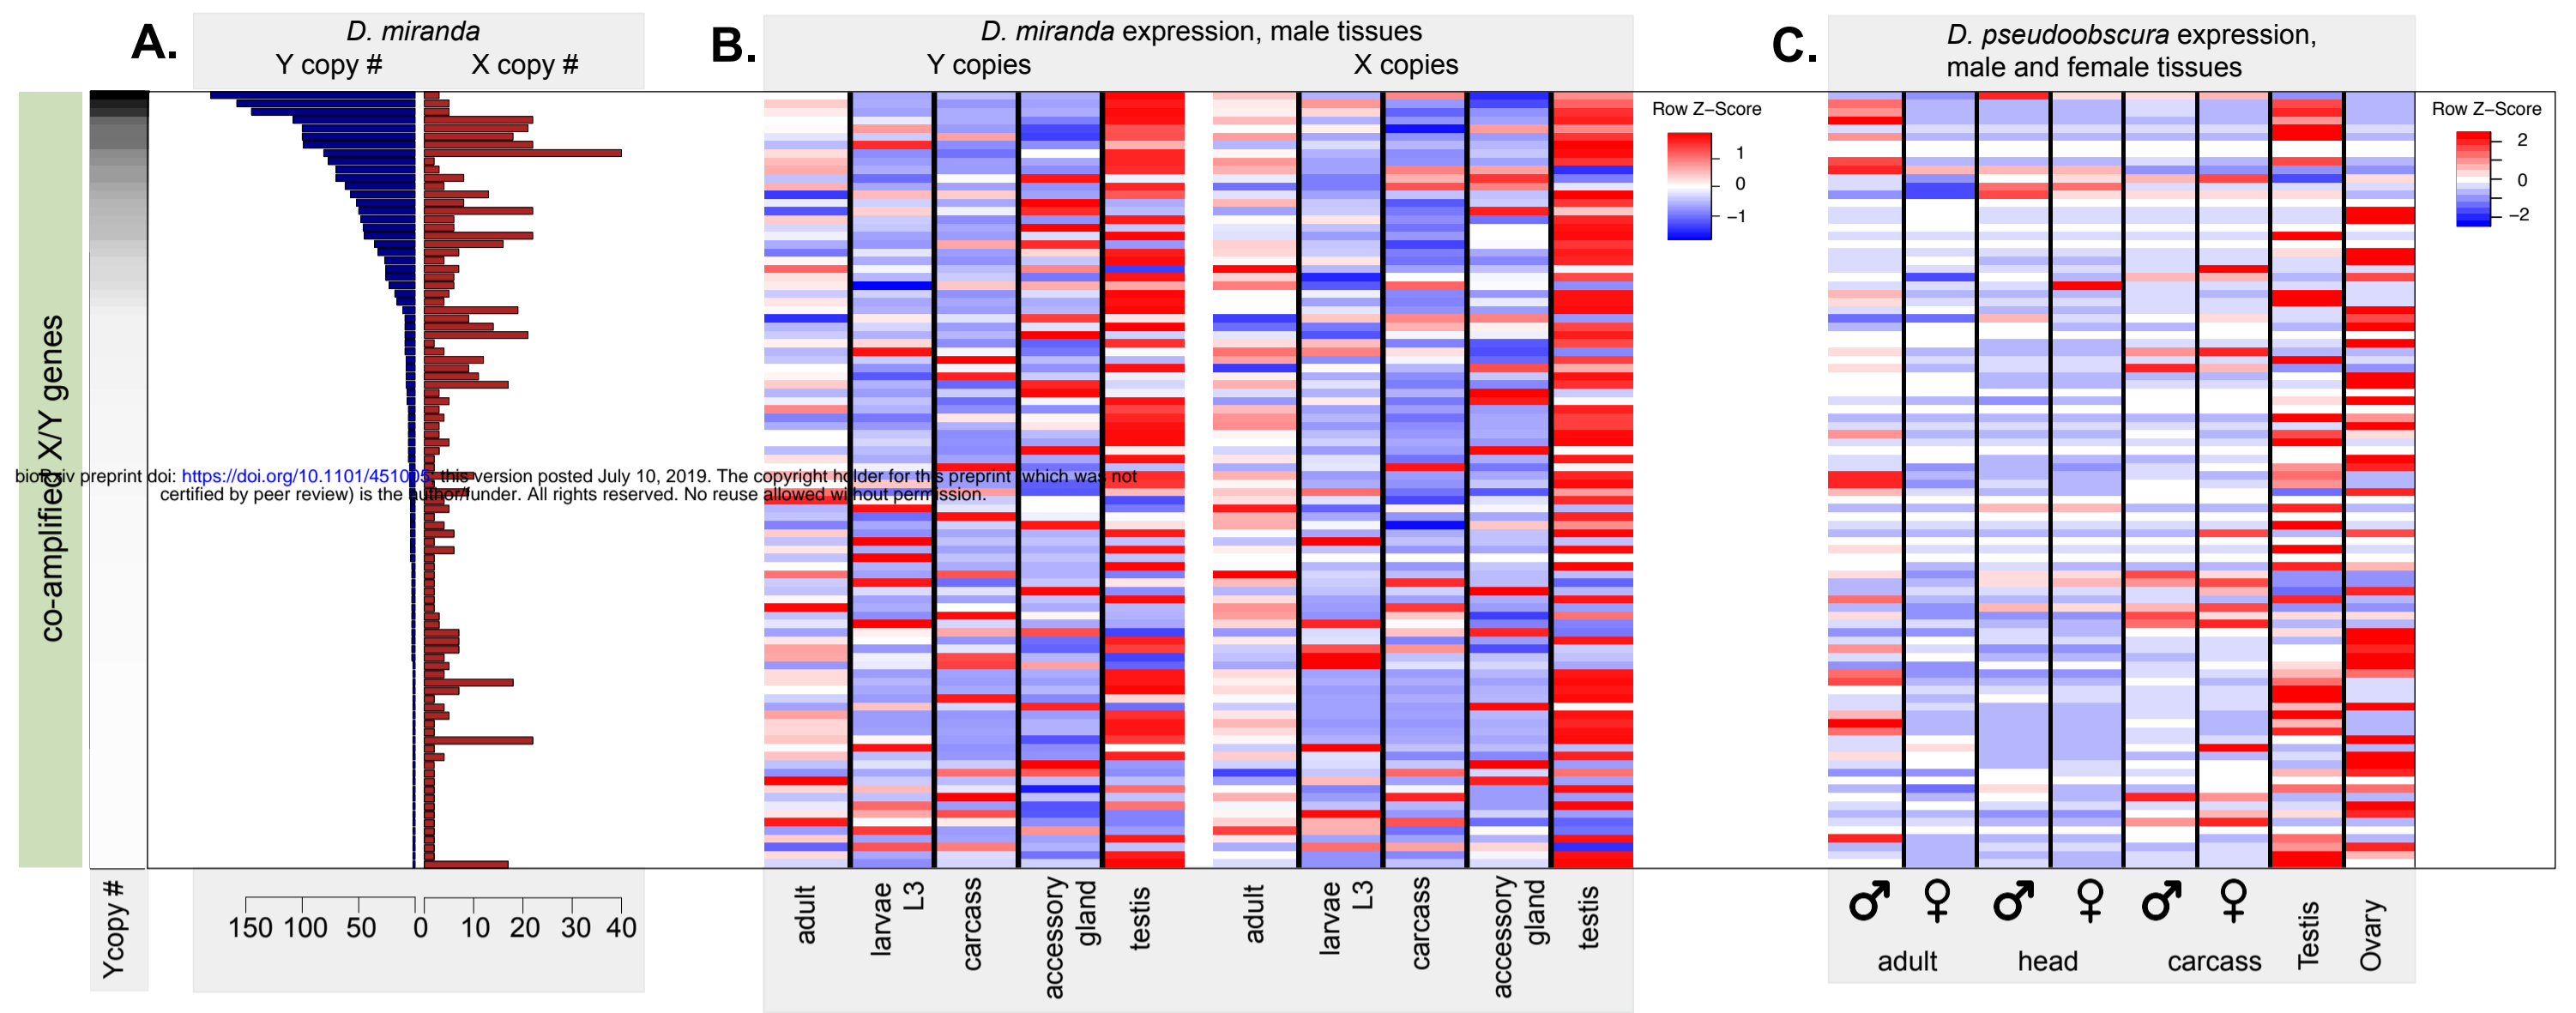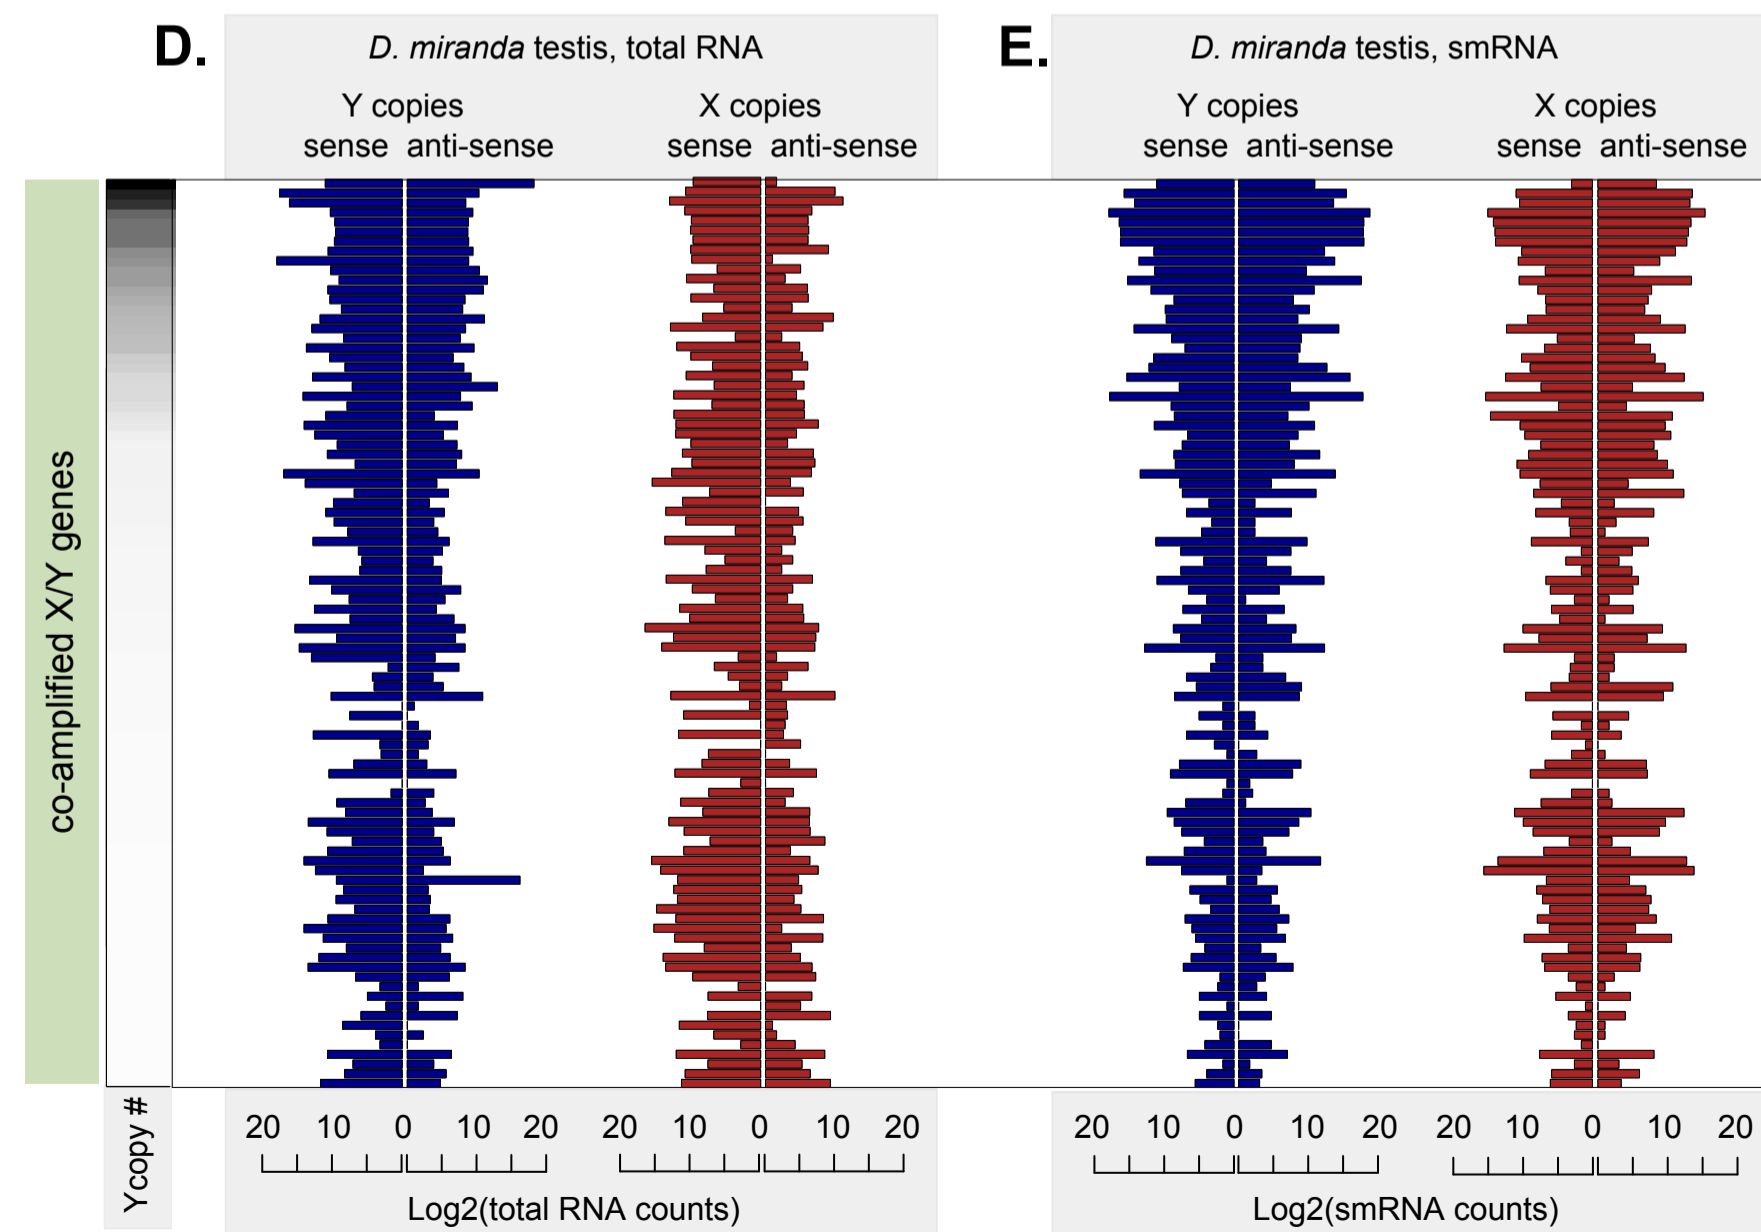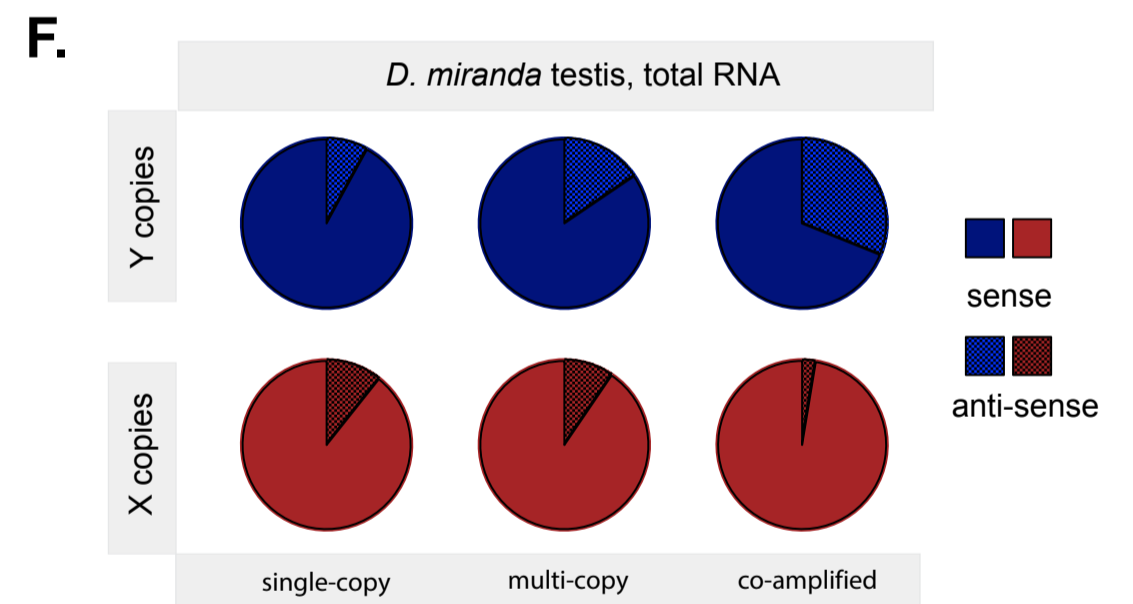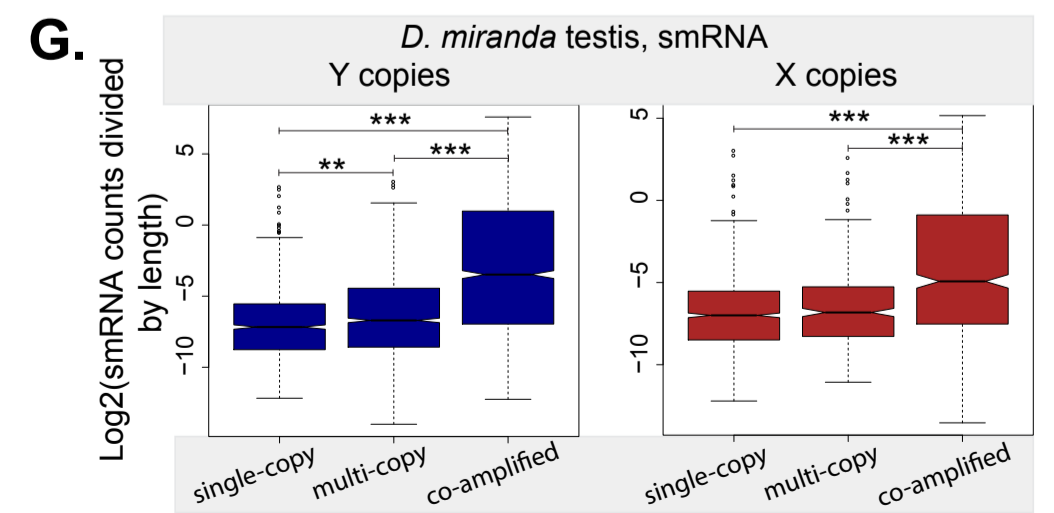



A.

## neo-X: mars

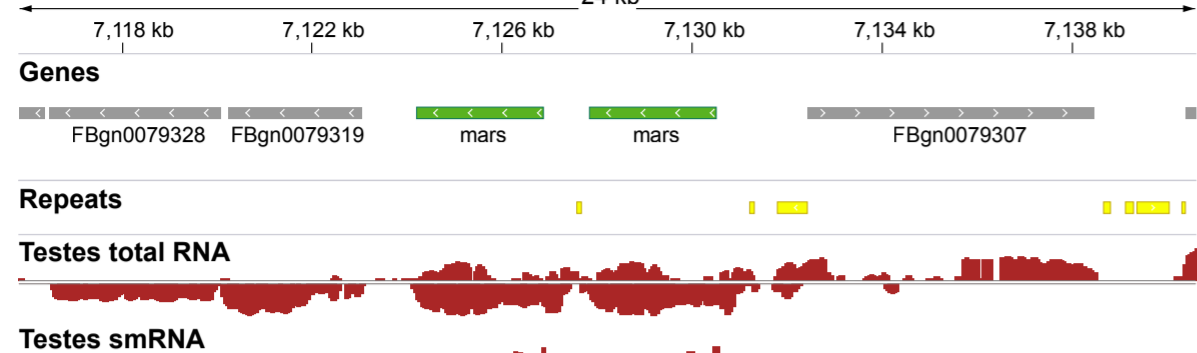

## neo-Y: mars

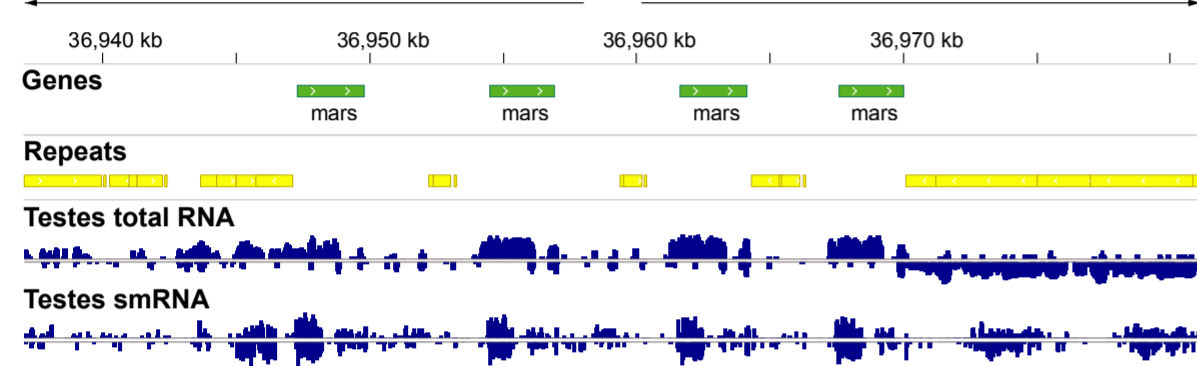

## neo-Y: mars

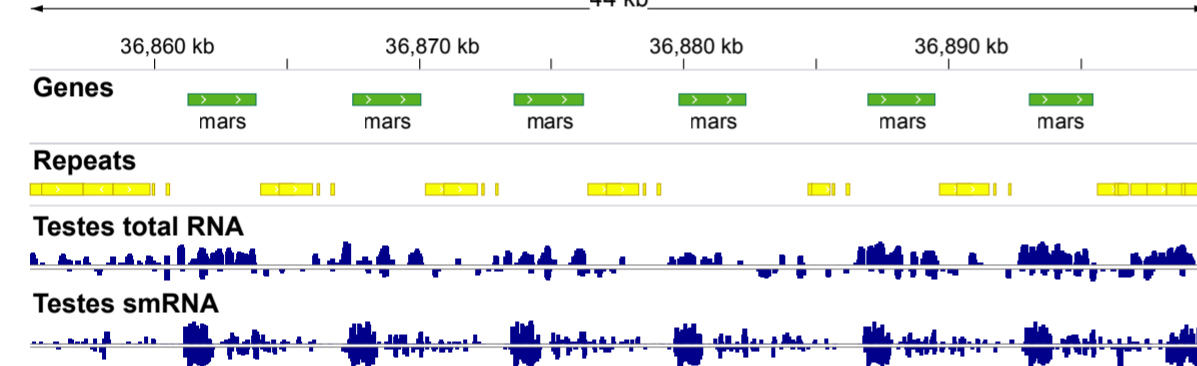

C.

## Muller A: zip

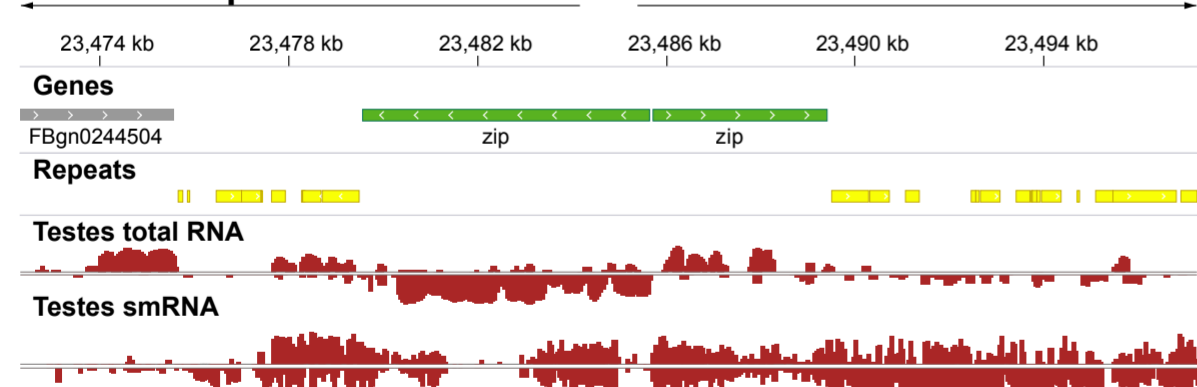

## neo-X: zip

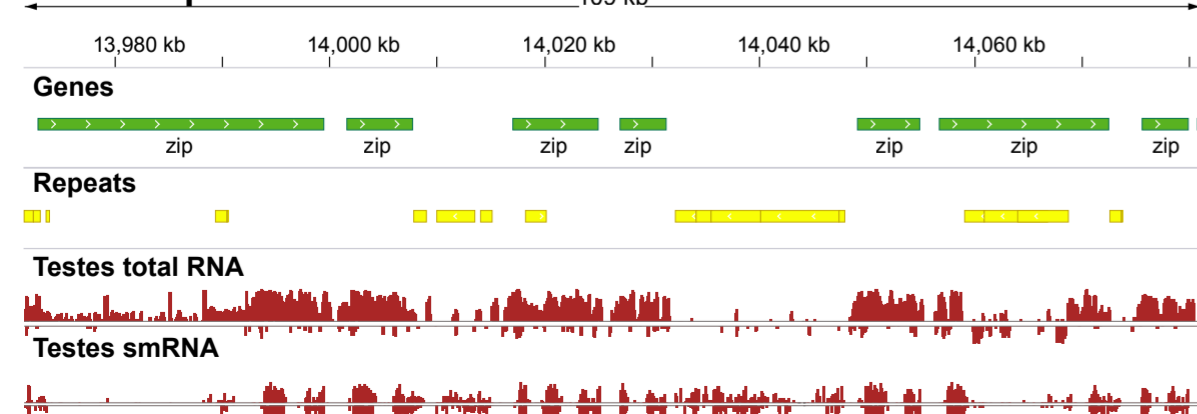

B.

## neo-X: fest

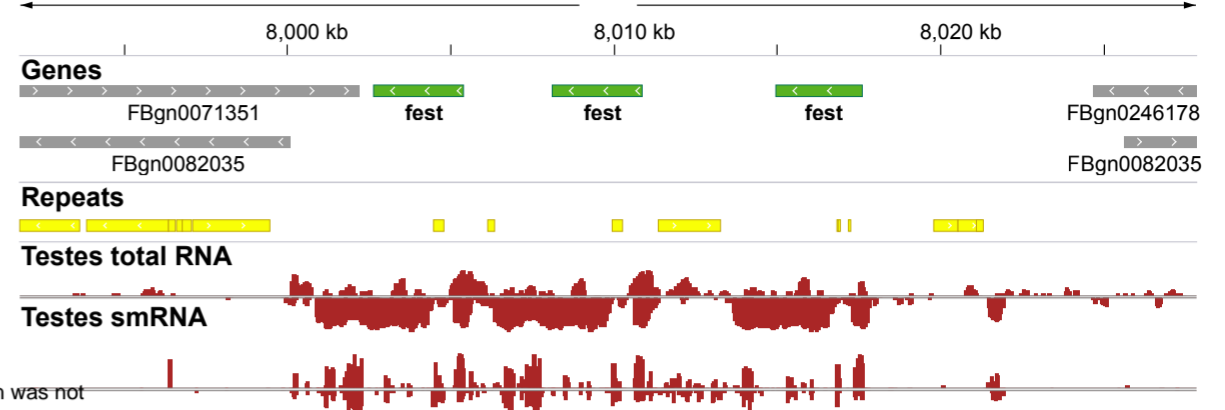

## neo-X: fest

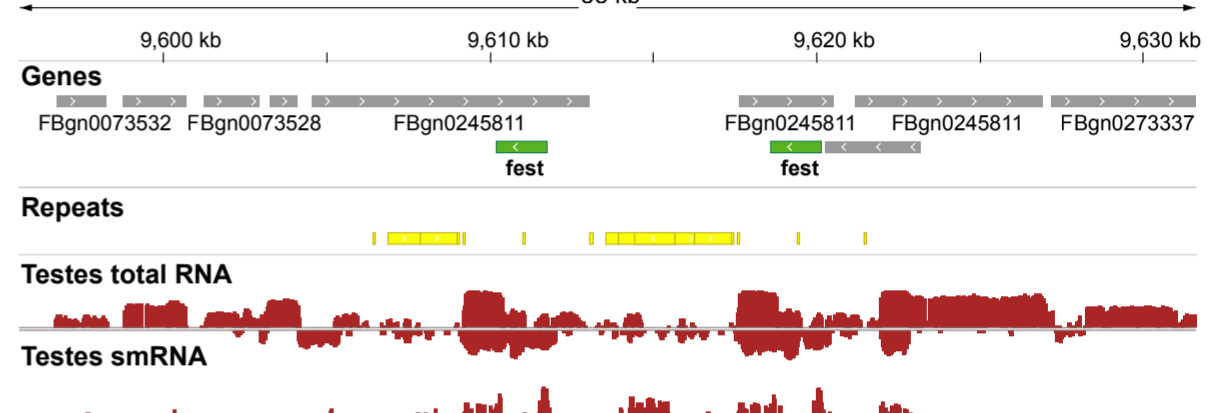

## neo-Y: fest

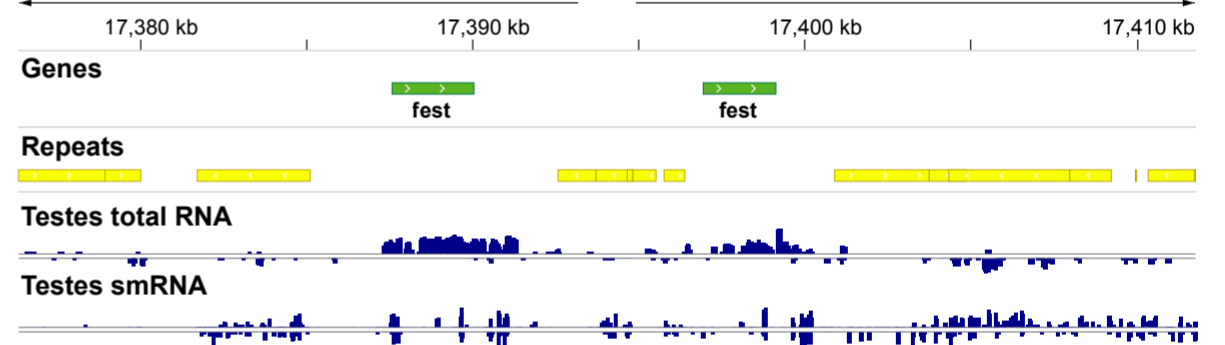

## neo-Y: fest

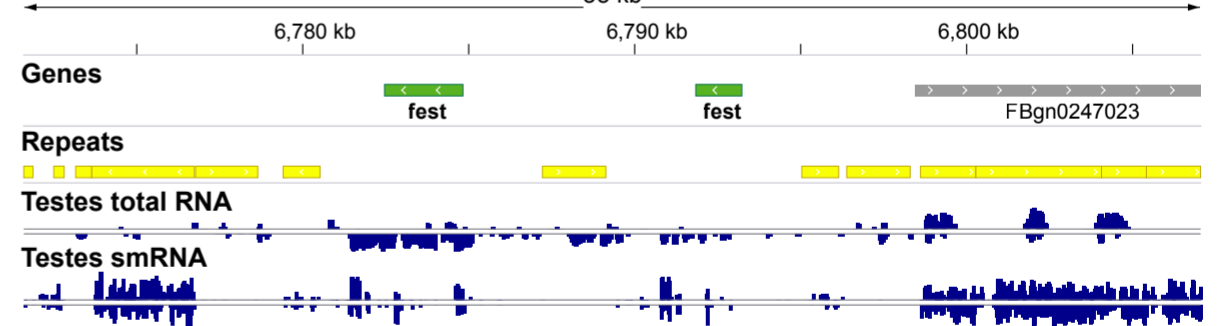

## neo-Y: zip

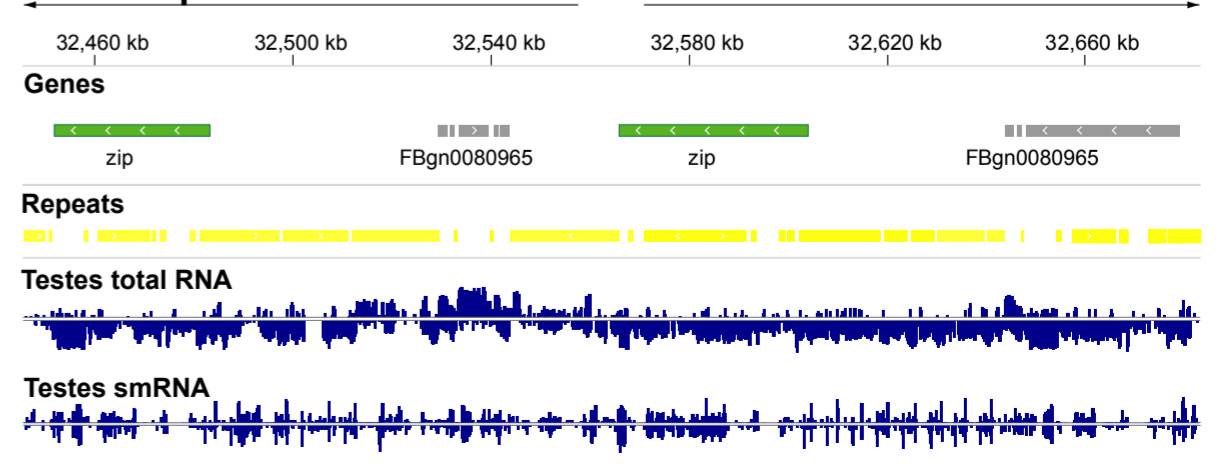

bioRxiv preprint doi: <https://doi.org/10.1101/451005>; this version posted July 10, 2019. The copyright holder for this preprint (which was not certified by peer review) is the author/funder. All rights reserved. No reuse allowed without permission.
